# Supplementary material for: Emergent antibacterial activity ofN-(thiazol-2-yl)benzenesulfonamides in conjunction with cell-penetrating octaarginine
Source: Royal Society of Chemistry journal article supplement (doi:10.1039/d1ra03882f), 2021-01-01
Supplement: d1ra03882f1.pdf [file d1ra03882f1.pdf]

## Supplementary Information

### Emergent Antibacterial Activity of N-(thiazol-2-yl)benzenesulfonamides in Conjunction with Cell-Penetrating Octaarginine

Poonam Ratrey<sup>1</sup>, Amarjyoti Das Mahapatra<sup>2</sup>, Shiny Pandit<sup>3</sup>, Murtuza Hadianawala<sup>2</sup>, Sasmita Majhi<sup>1</sup>, Abhijit Mishra<sup>1</sup>, Bhaskar Datta<sup>\*, 2,3</sup>

<sup>1</sup>Department of Materials Science and Engineering, <sup>2</sup>Department of Chemistry, <sup>3</sup>Department of Biological Engineering, Indian Institute of Technology, Gandhinagar, Gujarat, India

\* Corresponding author

\* Bhaskar Datta, Department of Chemistry & Biological Engineering, Indian Institute of Technology Gandhinagar, Palaj, Gandhinagar 382355 India.

Telephone: 079-2395-2073; Fax: 079-2397-2622; E-mail: [bdatta@iitgn.ac.in](mailto:bdatta@iitgn.ac.in)

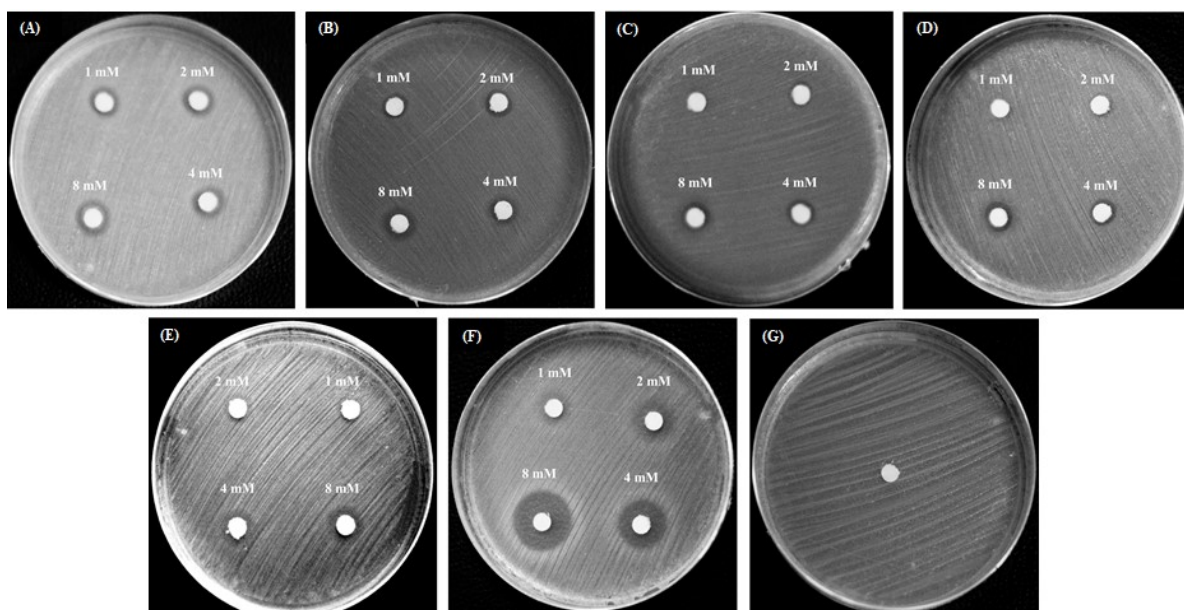

**Figure S1.** Zone of inhibition of active compounds (A) tert-butyl (B) isopropyl (C) chlorine (D) methyl (E) H (F) positive control (*Chloramphenicol*) and (G) negative control (DMSO) against *Escherichia coli* at different diluted concentrations (1 mM, 2 mM, 4 mM, 8 mM).

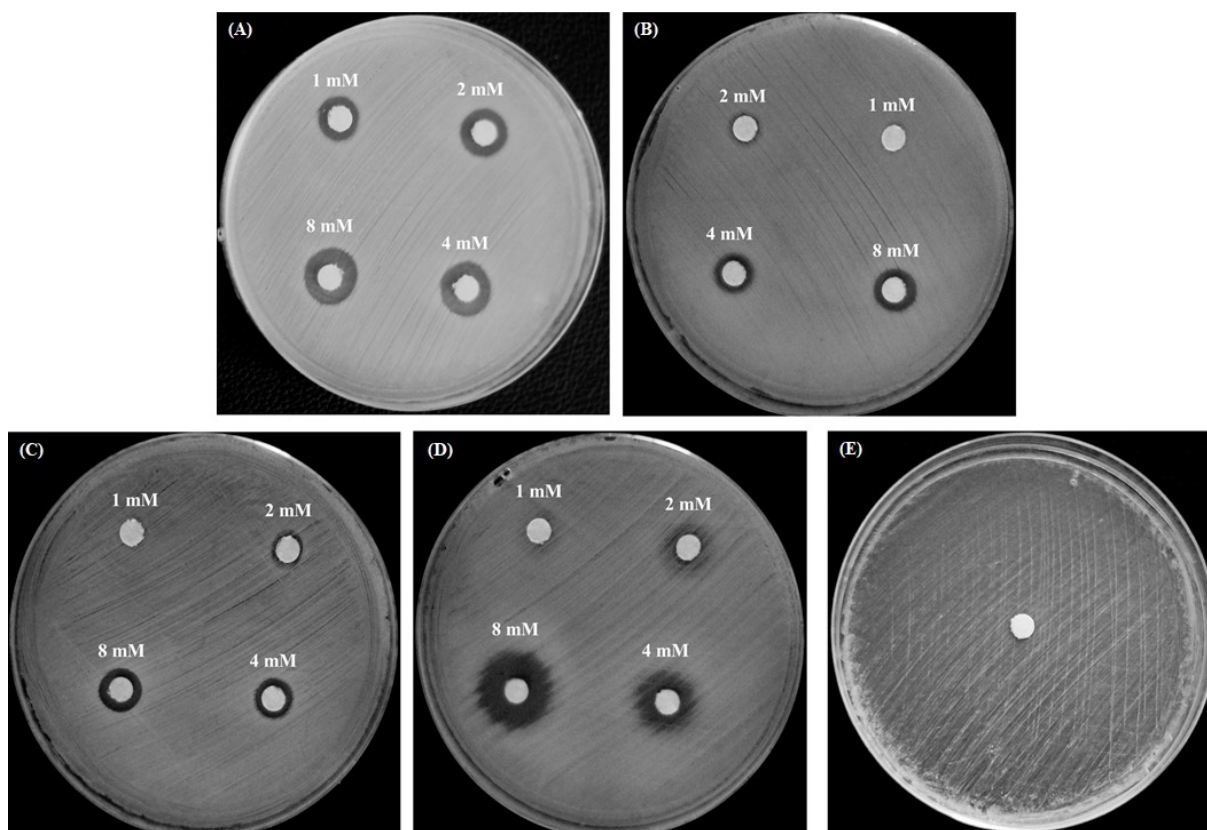

**Figure S2.** Zone of inhibition of active compounds (A) tert-butyl (B) isopropyl (C) chlorine (D) positive control (*Chloramphenicol*) and (E) negative control (DMSO) against *Staphylococcus aureus* at different diluted concentrations (1 mM, 2 mM, 4 mM, 8 mM).

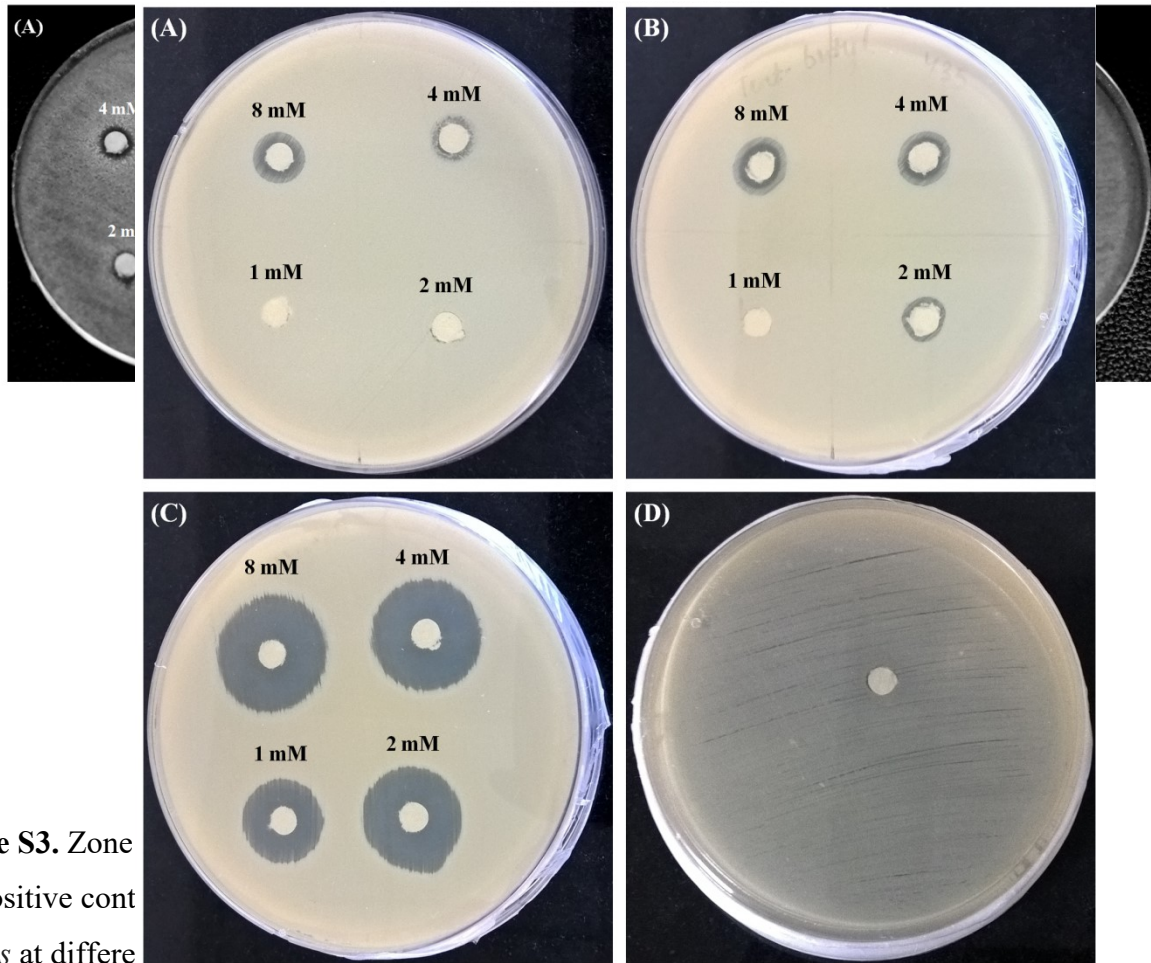

**Figure S3.** Zone of inhibition of *Bacillus subtilis* at different concentrations. (D) positive control.

**Figure S4.** Zone of inhibition of active compounds (A) isopropyl (B) tert-butyl (C) positive control (*Chloramphenicol*) (D) negative control (DMSO) against *Staphylococcus epidermidis* at different diluted concentrations (1 mM, 2 mM, 4 mM, 8 mM).

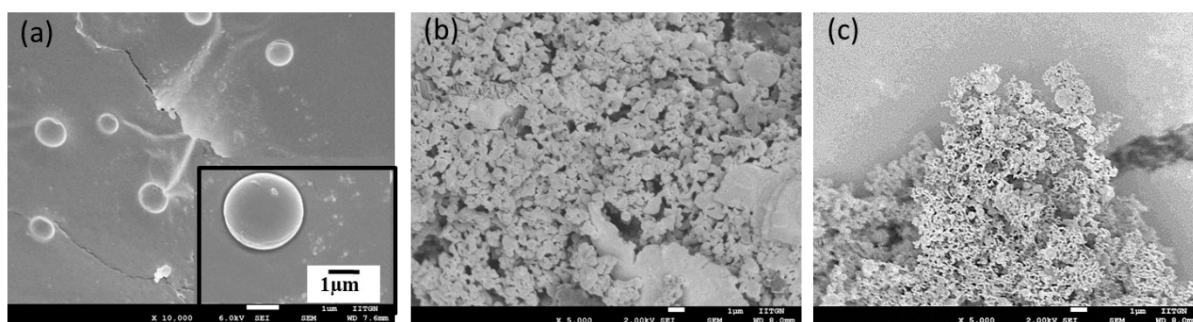

**Figure S5.** Powder scanning electron micrographs (a) Bare peptide with inset showing a zoomed particle, (b) bare 5a drug and (c) 5a-peptide complex



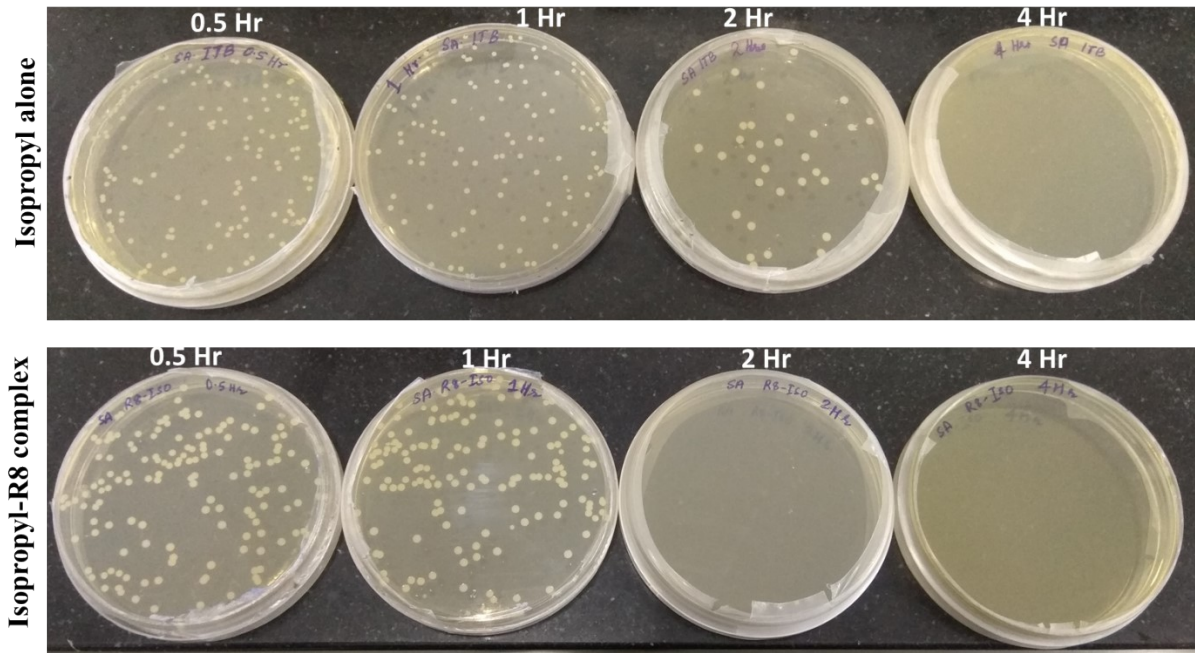

**Figure S6.** Time-kill assay – Agar plates showing *S. aureus* colonies and killing of all the cells within 2h hours for isopropyl-R8 complex while 4 hours for isopropyl alone.

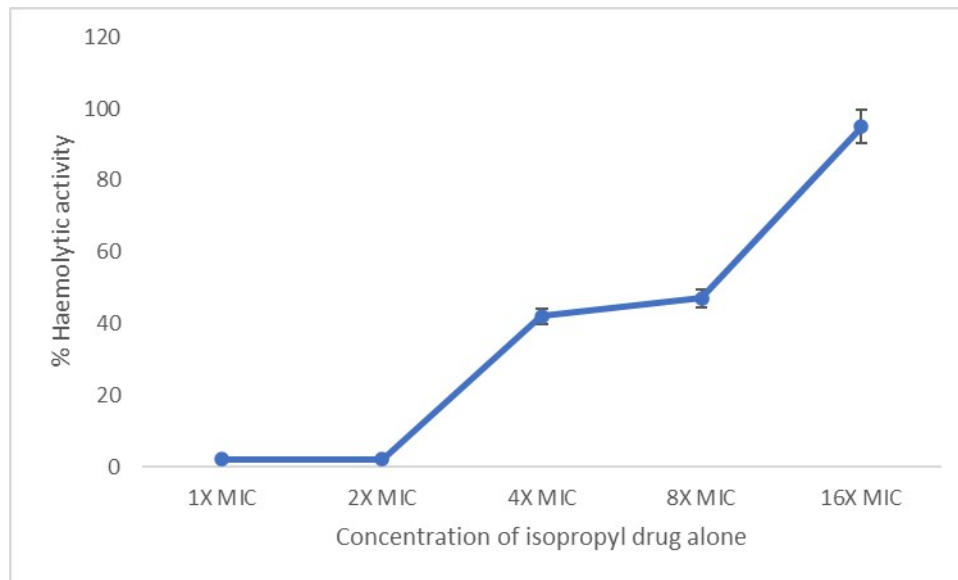

**Figure S7.** Haemolytic activity of isopropyl alone (without complexation) against human RBCs

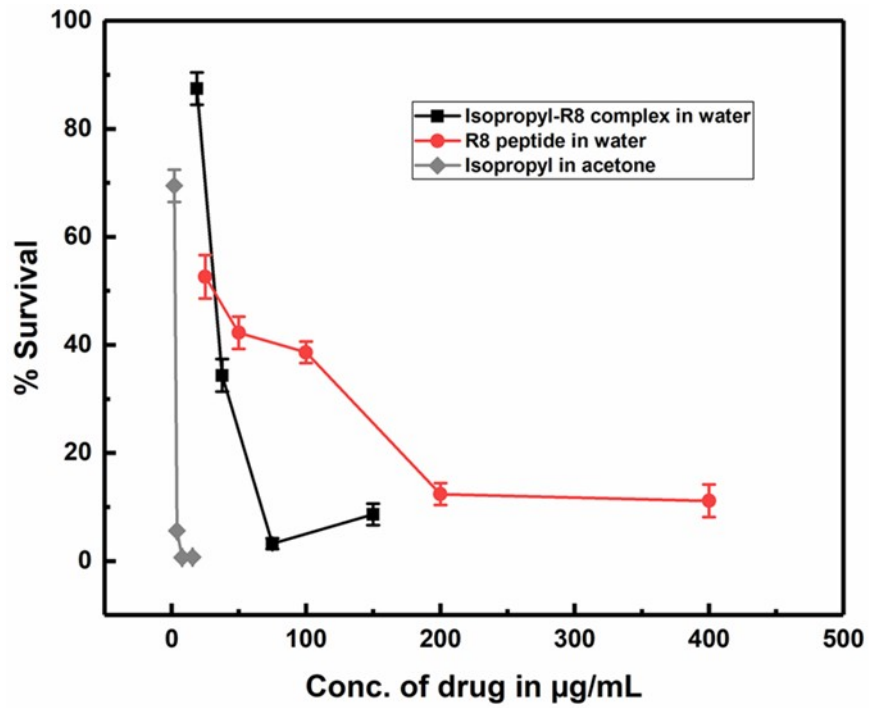

**Figure S8:** Antibacterial activity of isopropyl/5a alone, R8 alone and complex of isopropyl and R8 against *S. aureus*

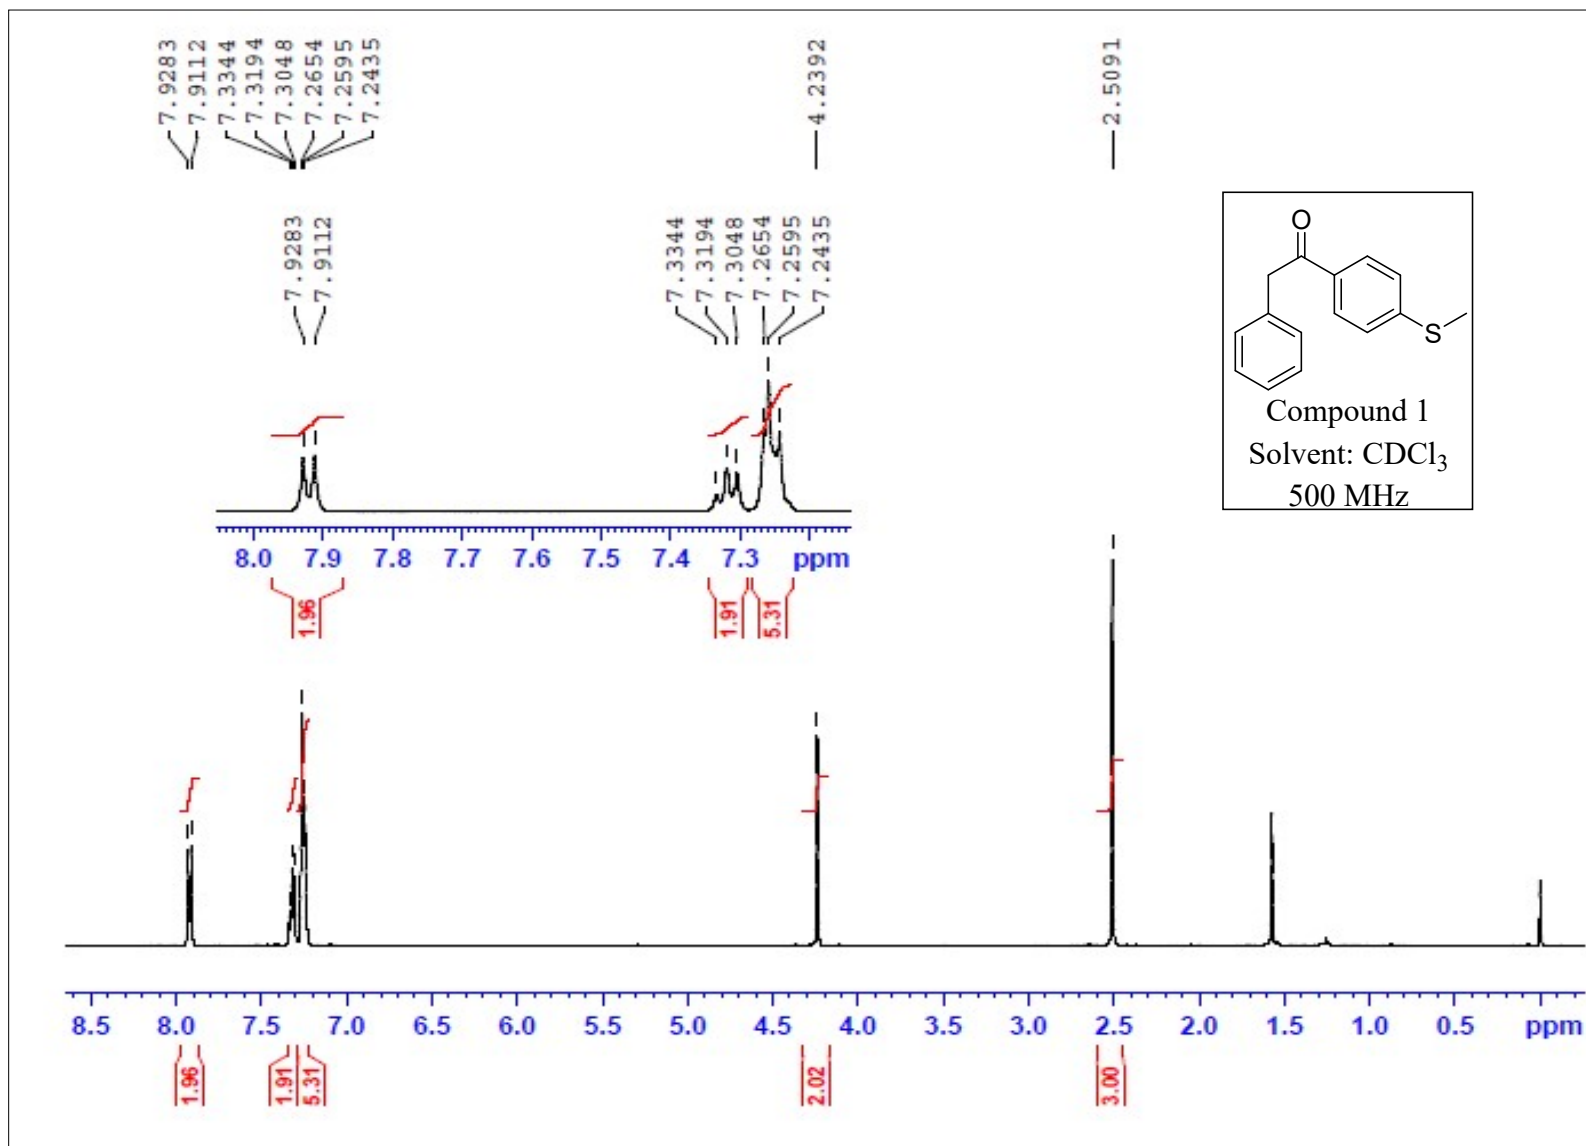

$^1\text{H}$  NMR of Compound 1



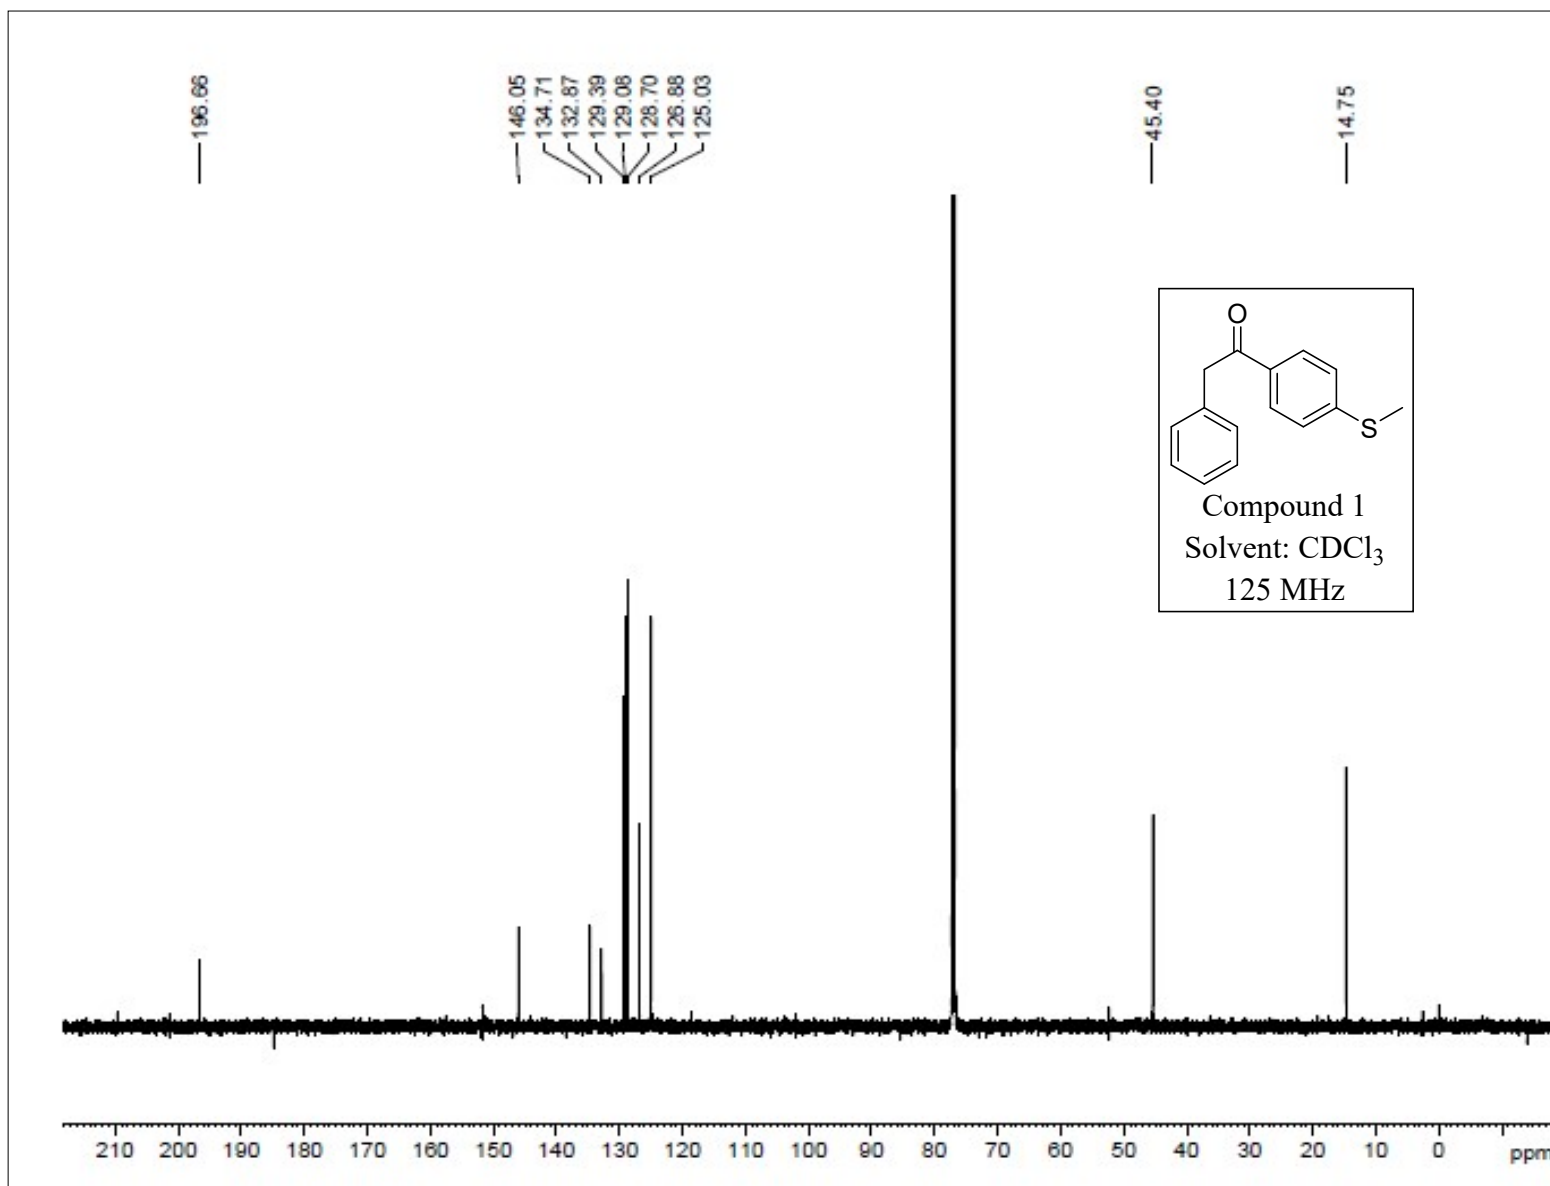

<sup>13</sup>C NMR of Compound 1

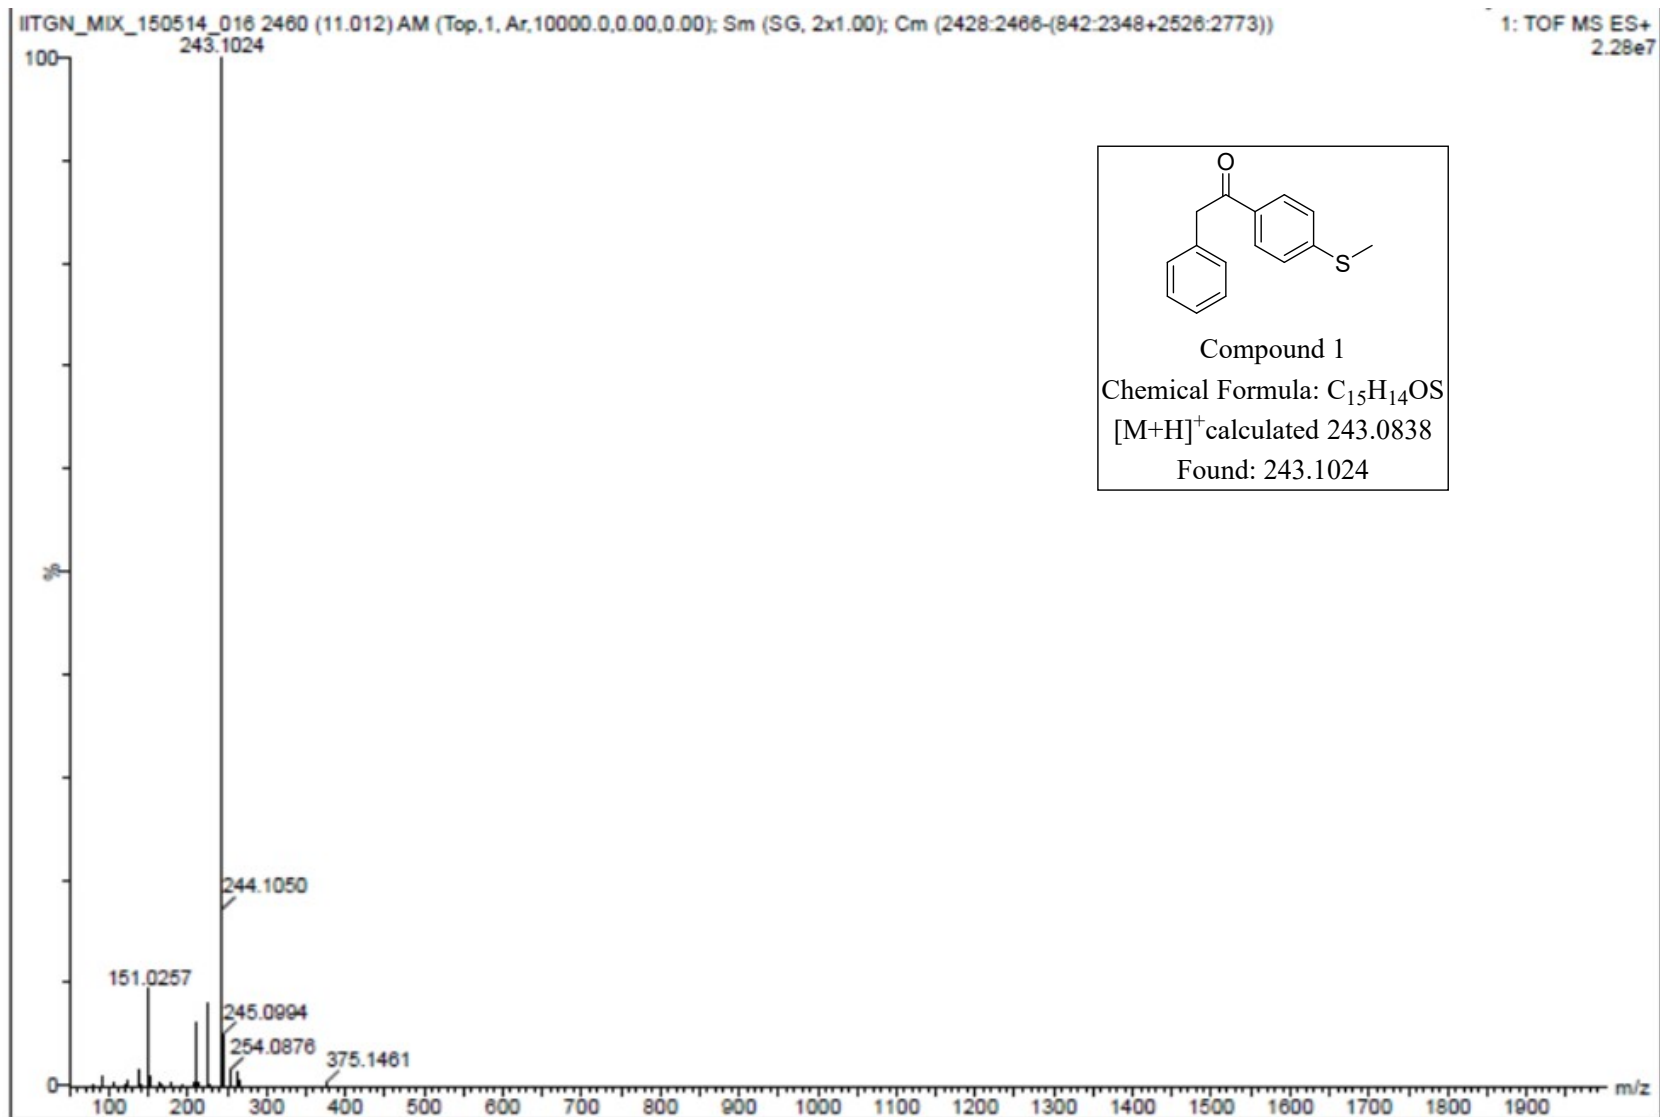

LC-ESIMS of Compound 1

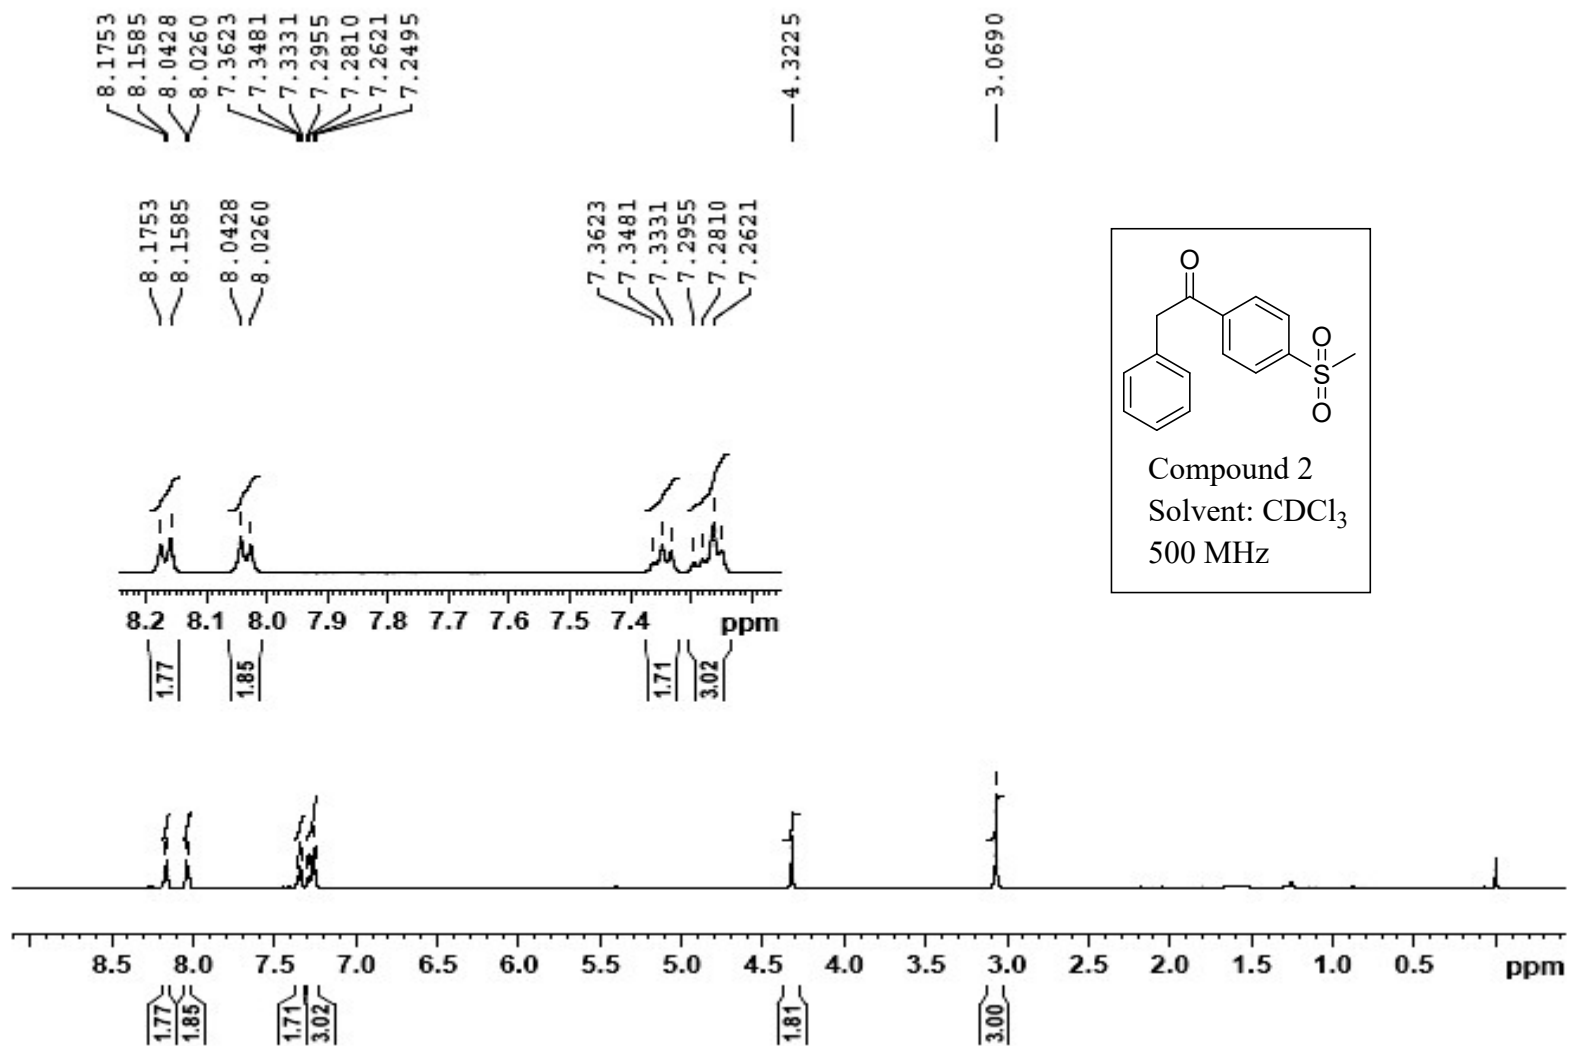

<sup>1</sup>H NMR of Compound 2

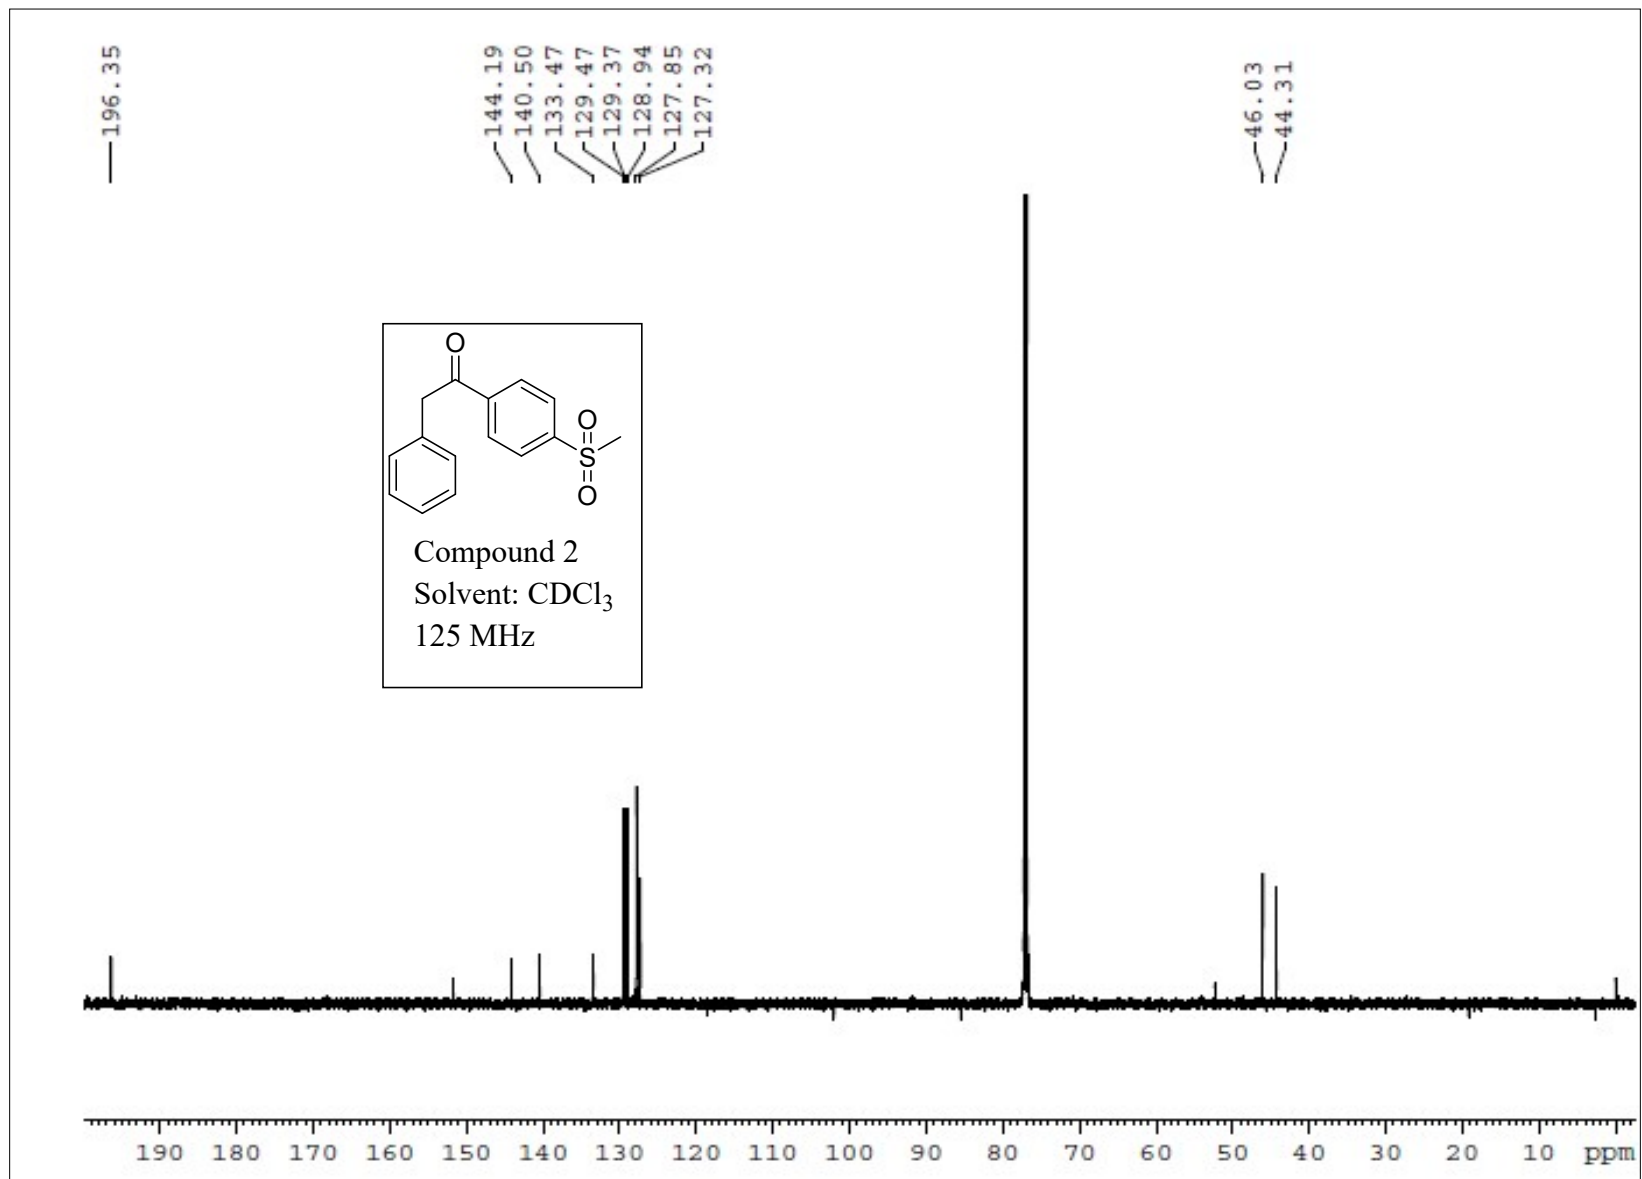

<sup>13</sup>C NMR of Compound 2

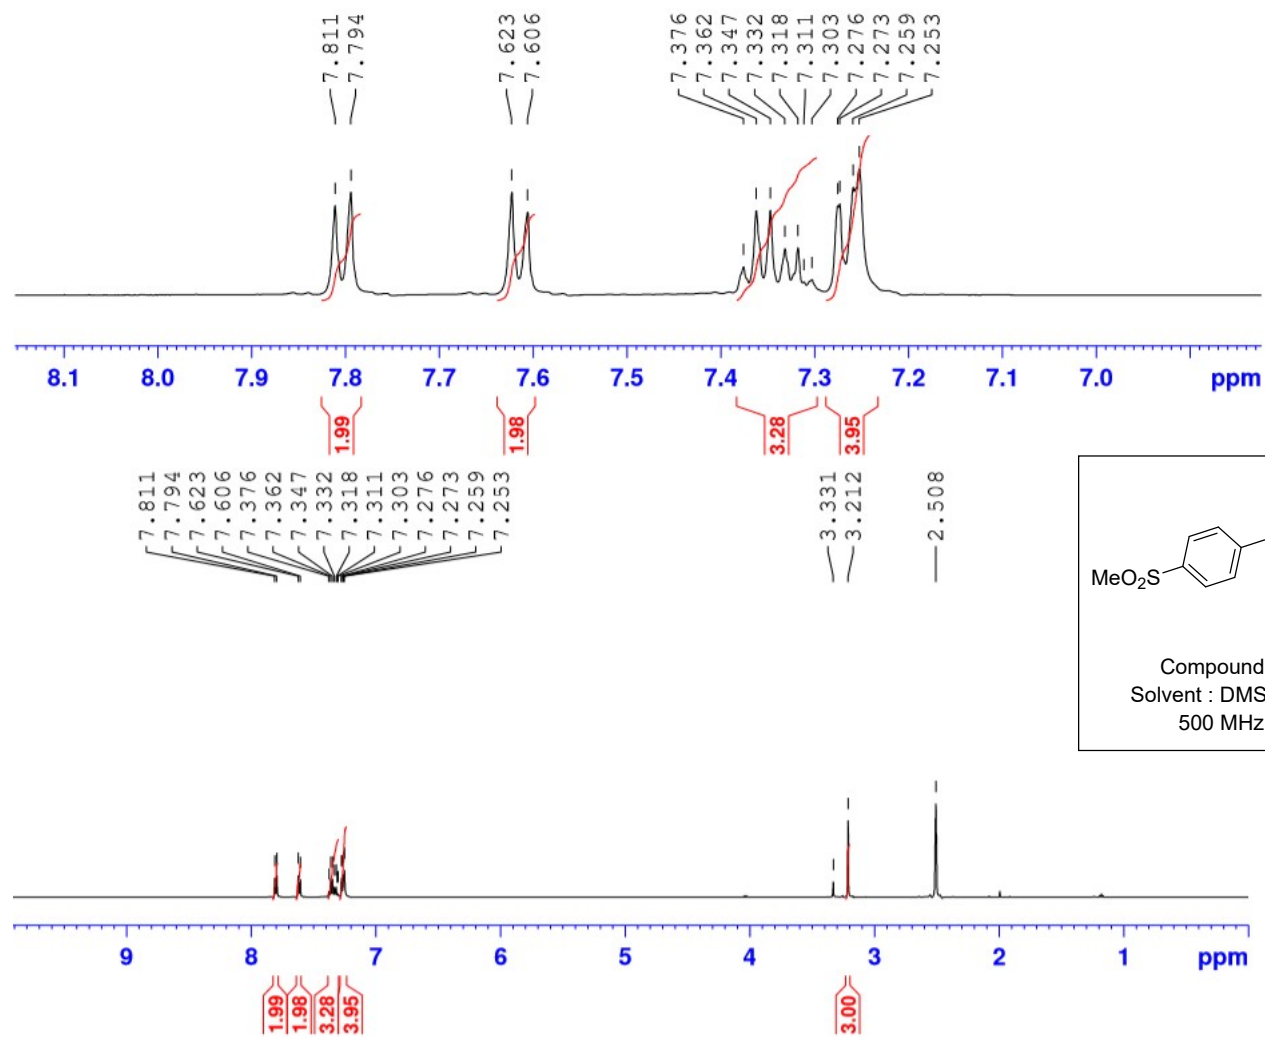

<sup>1</sup>H NMR of compound 4

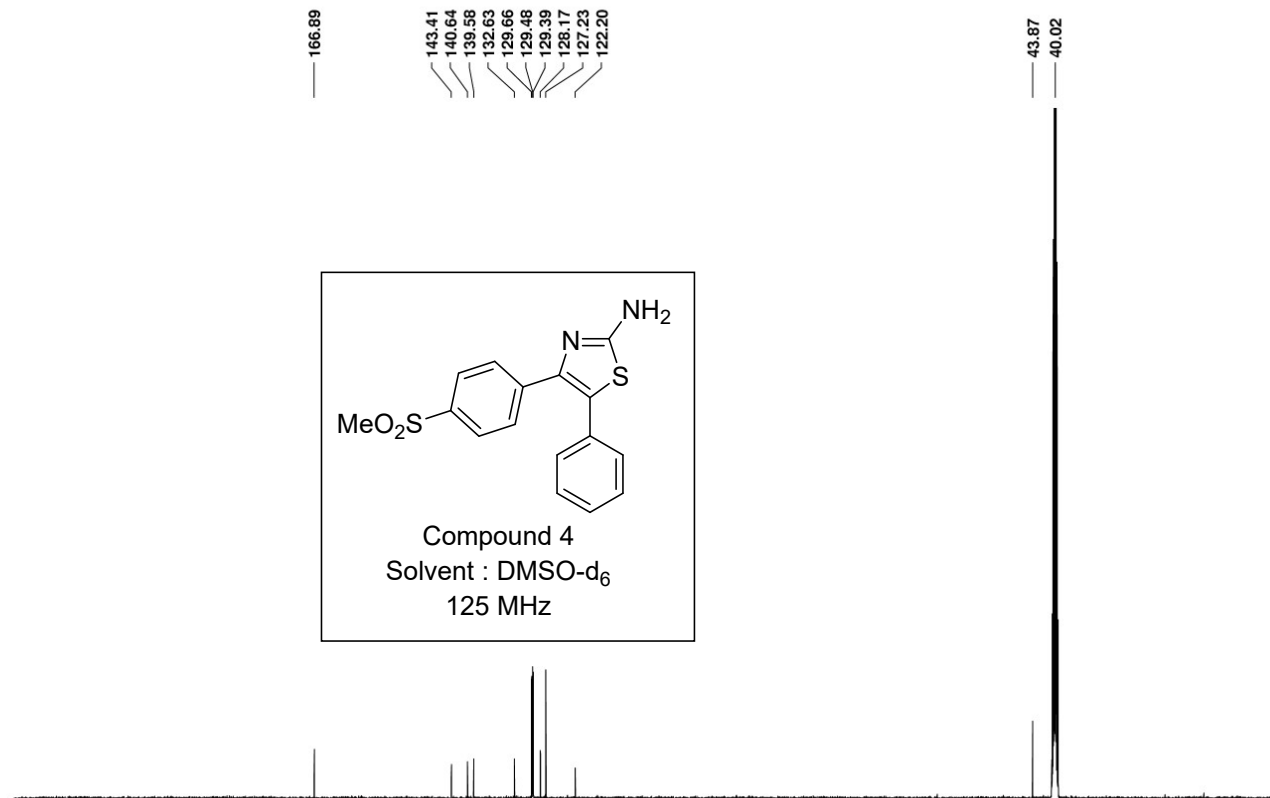

<sup>13</sup>C NMR of Compound 4



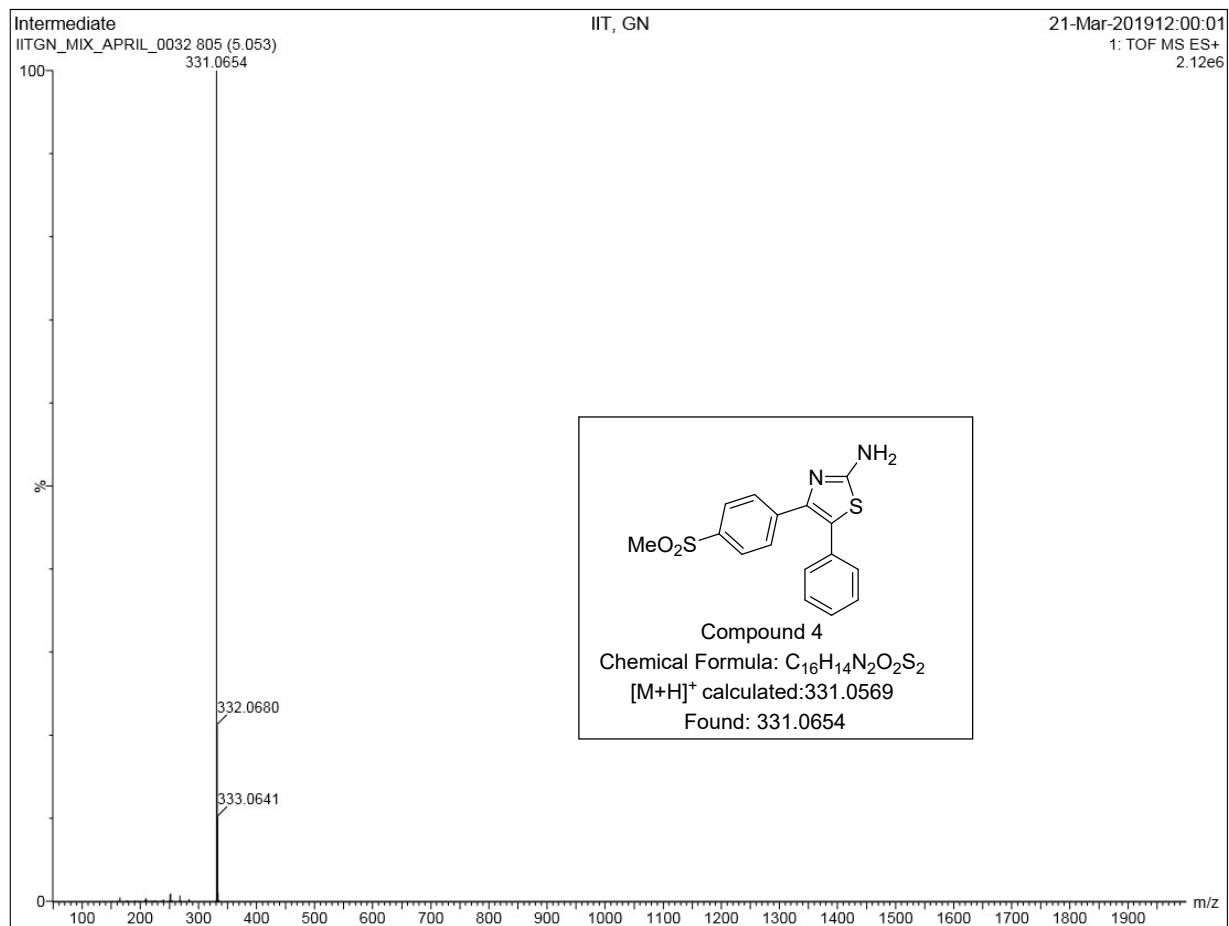

LC-ESIMS of Compound 4

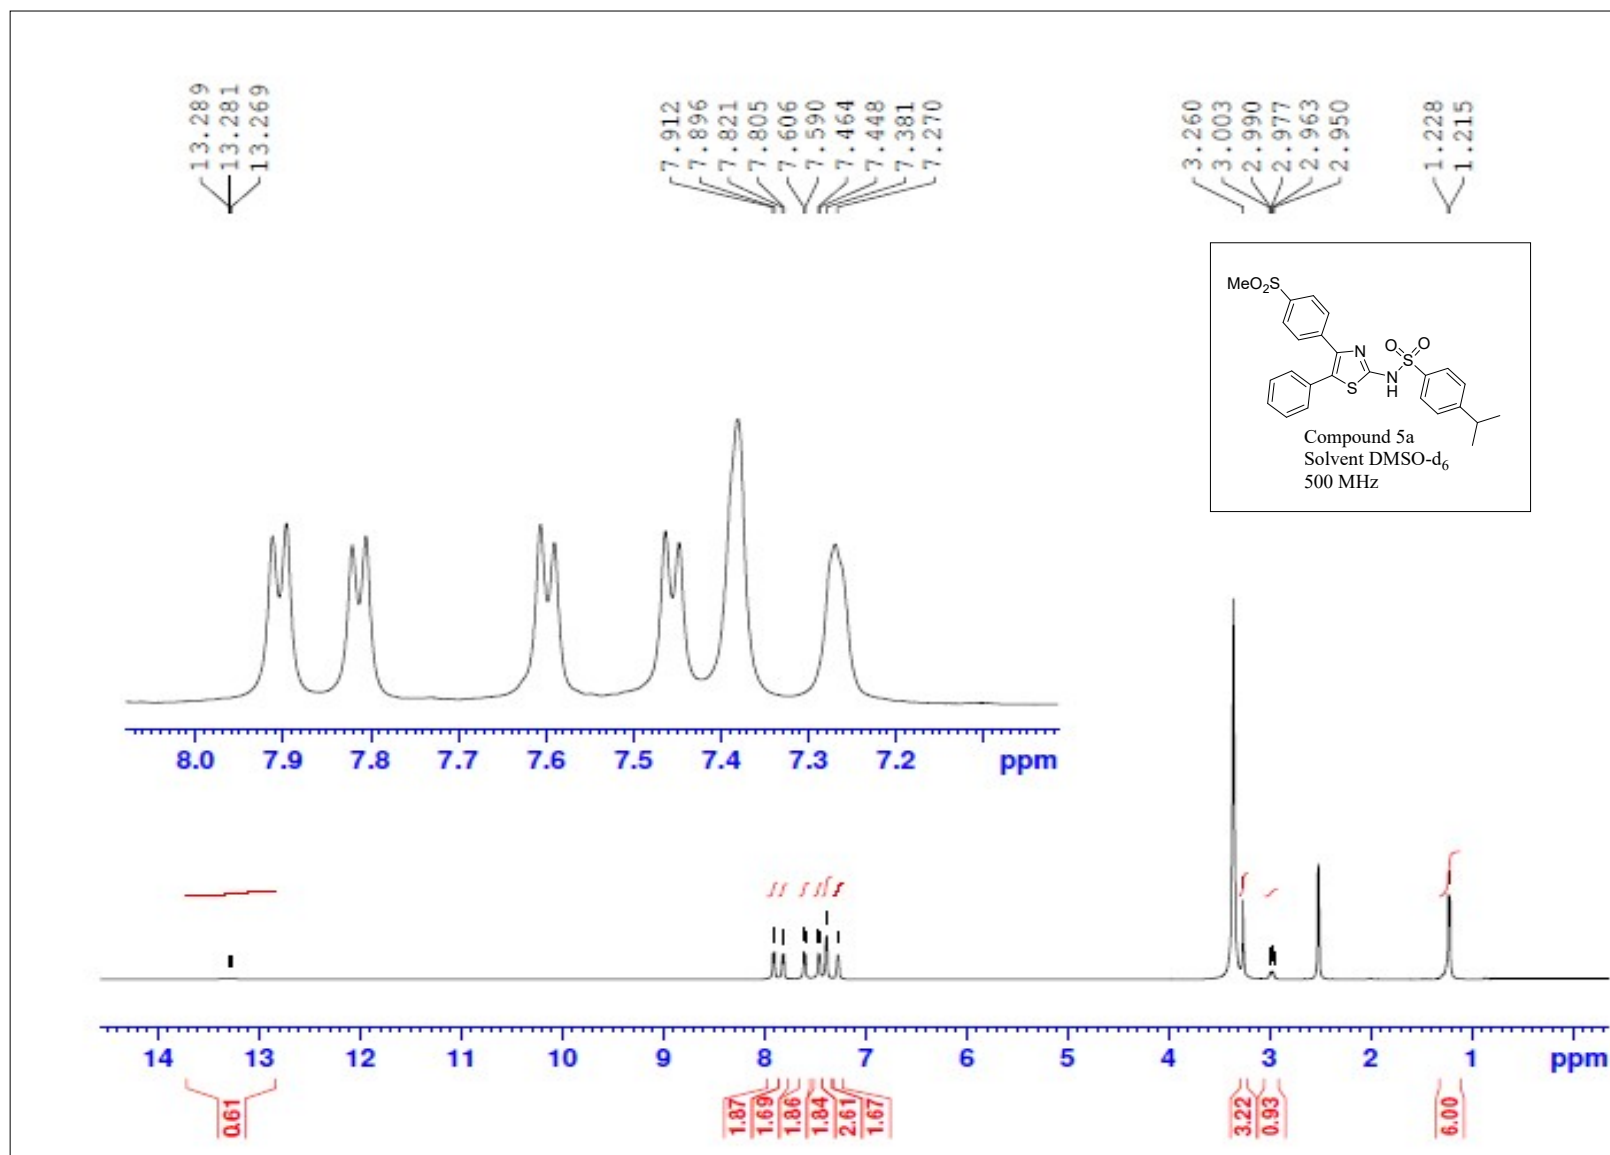

<sup>1</sup>H NMR of Compound 5a

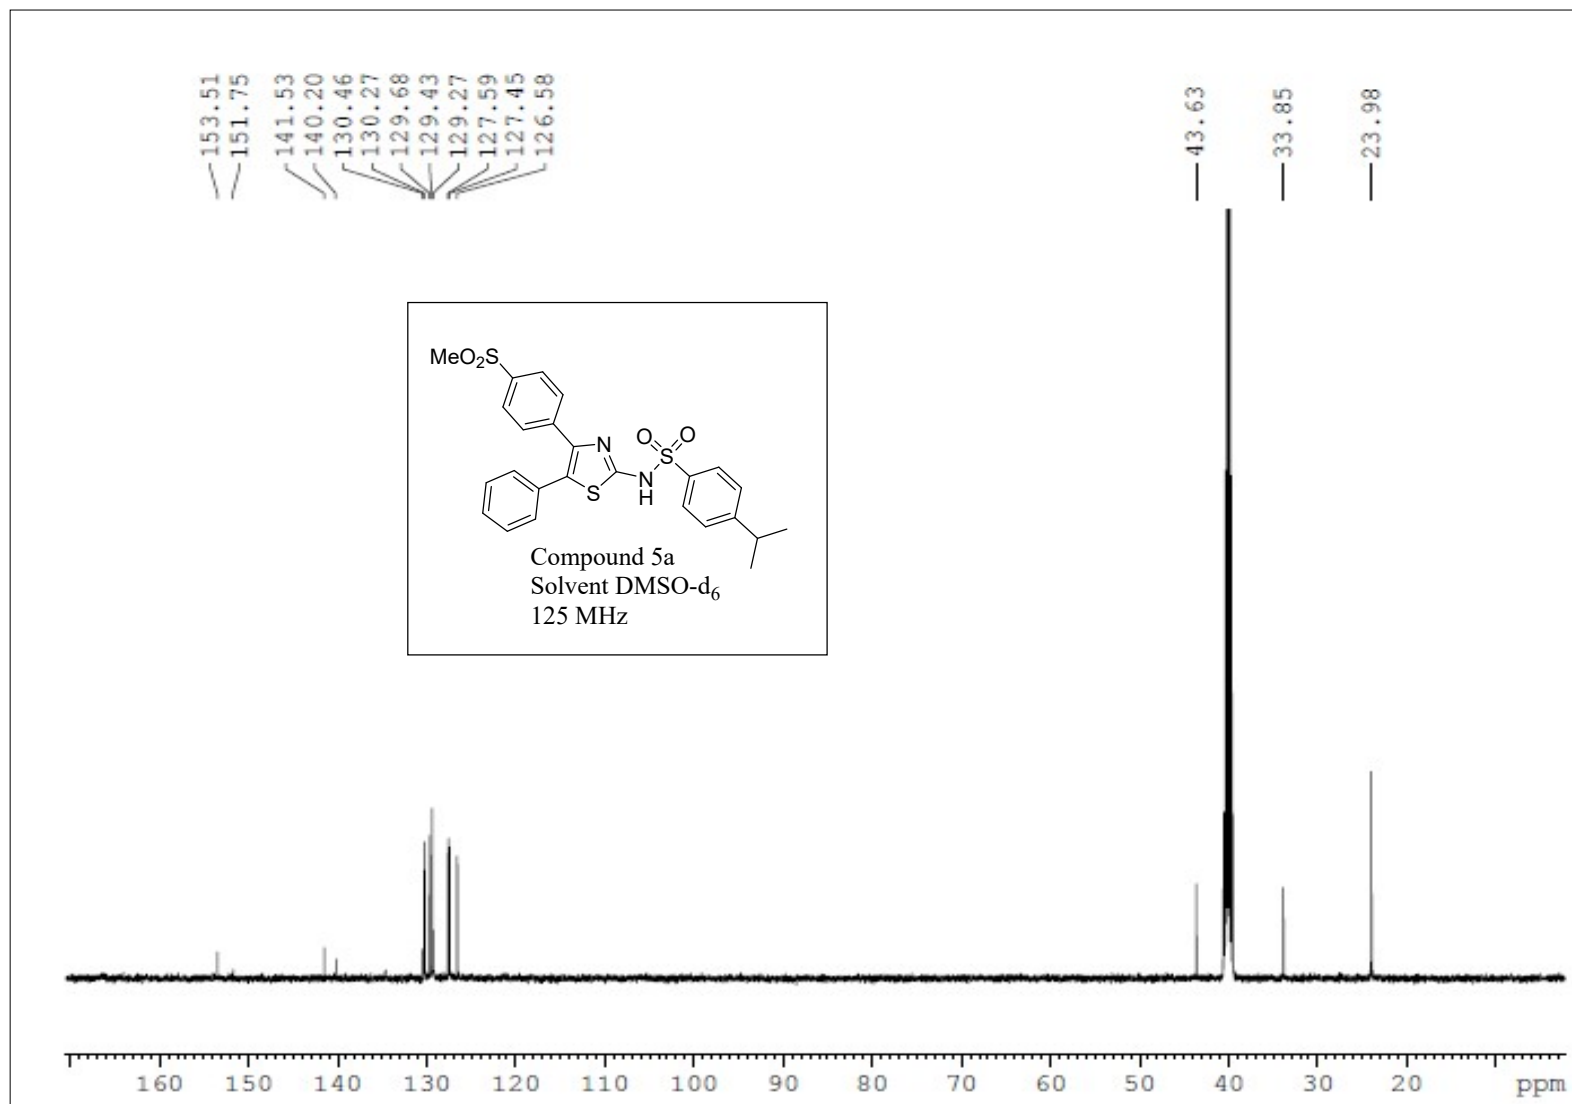

<sup>13</sup>C NMR of Compound 5a

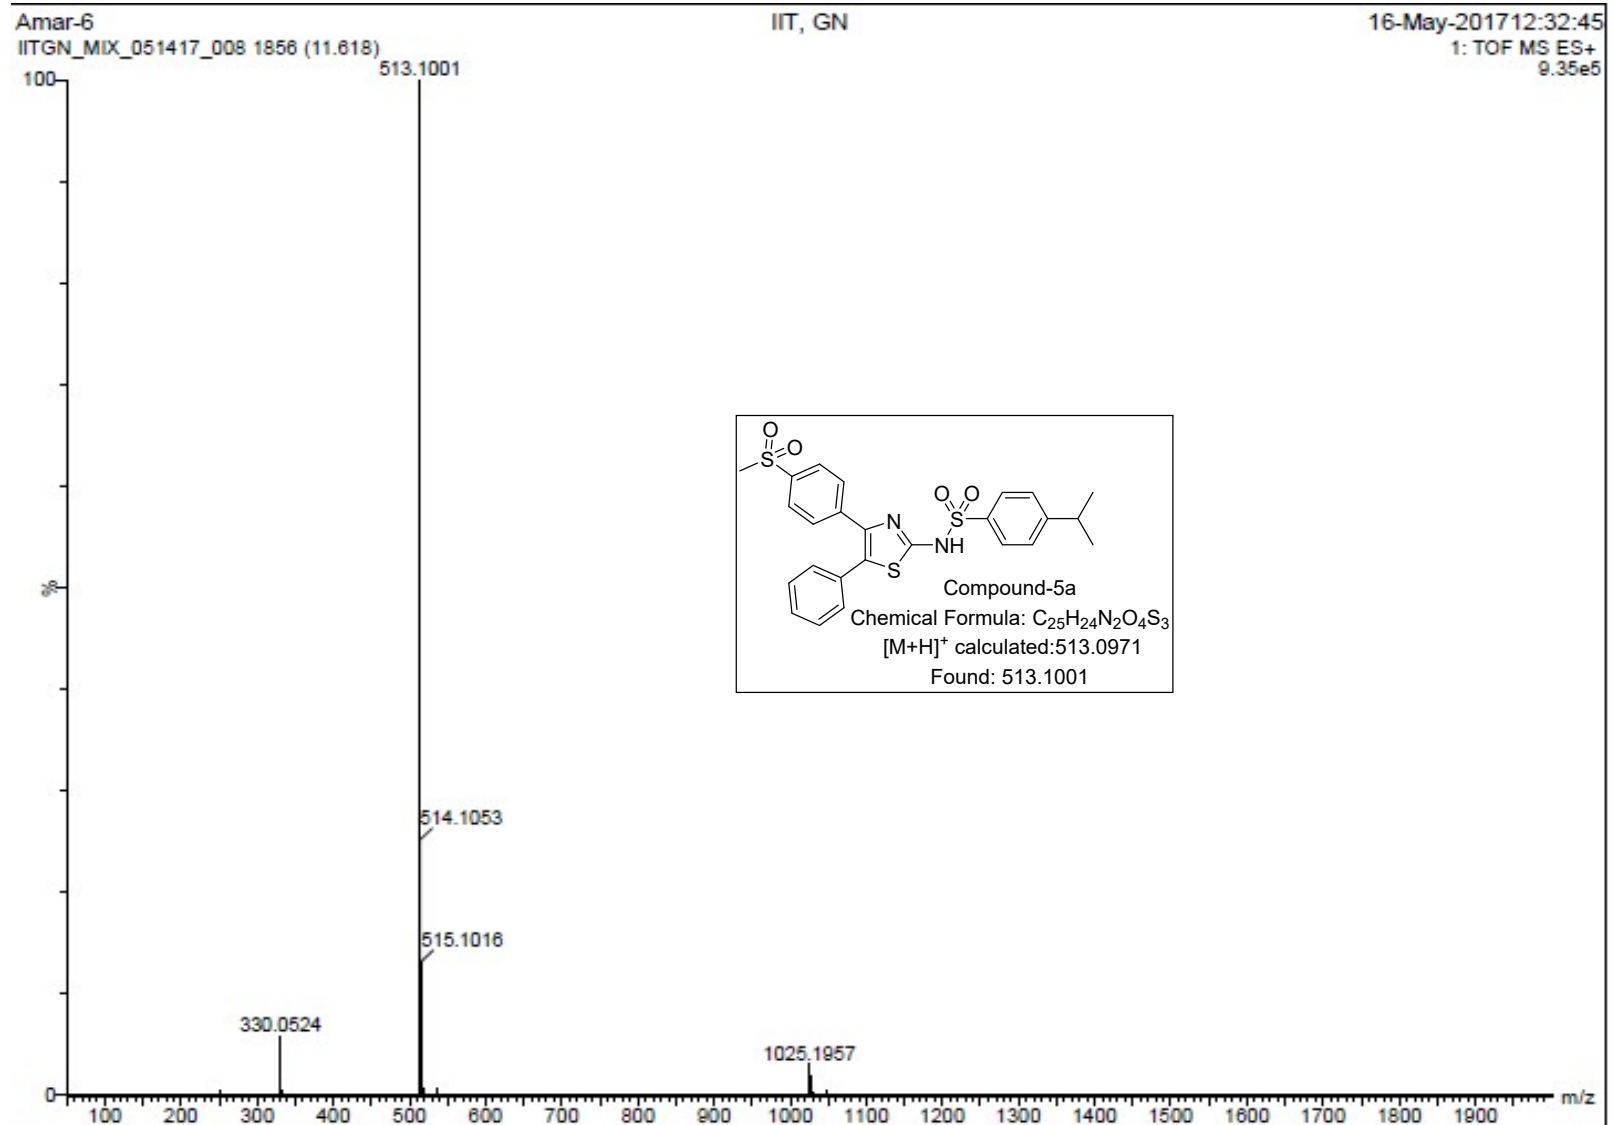

LC-ESIMS of Compound 5a

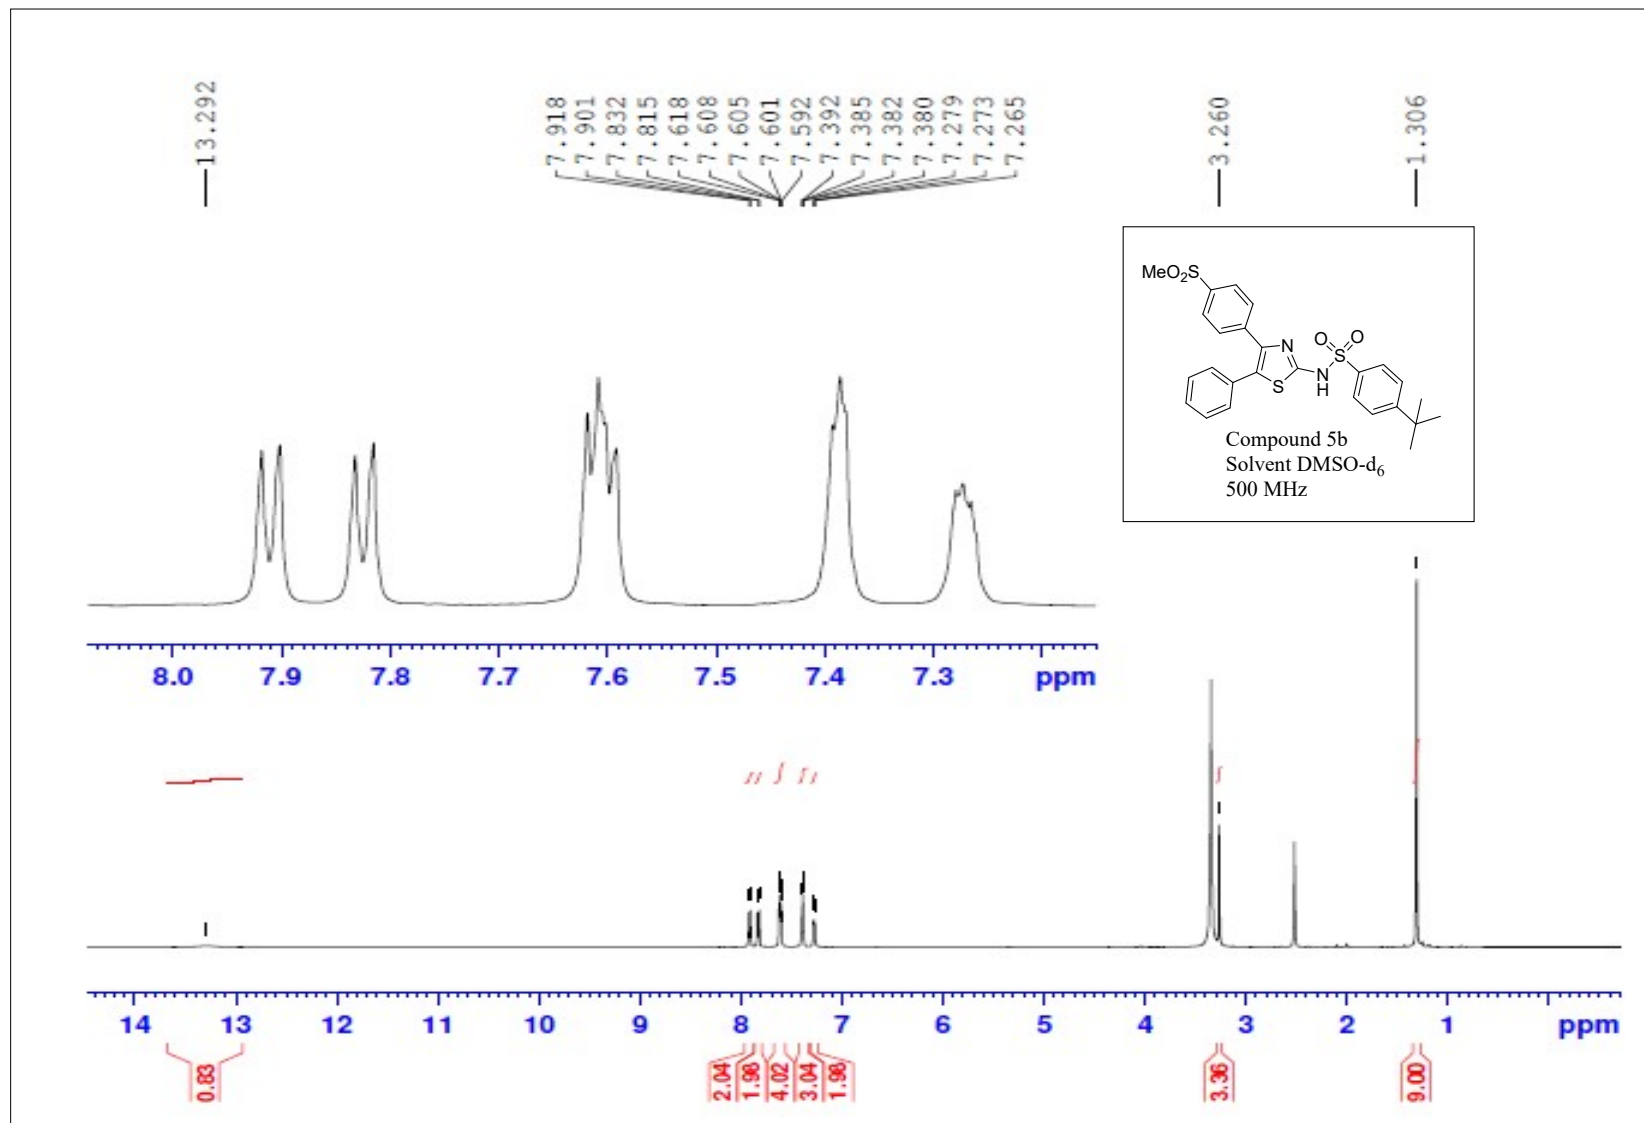

<sup>1</sup>H NMR of Compound 5b

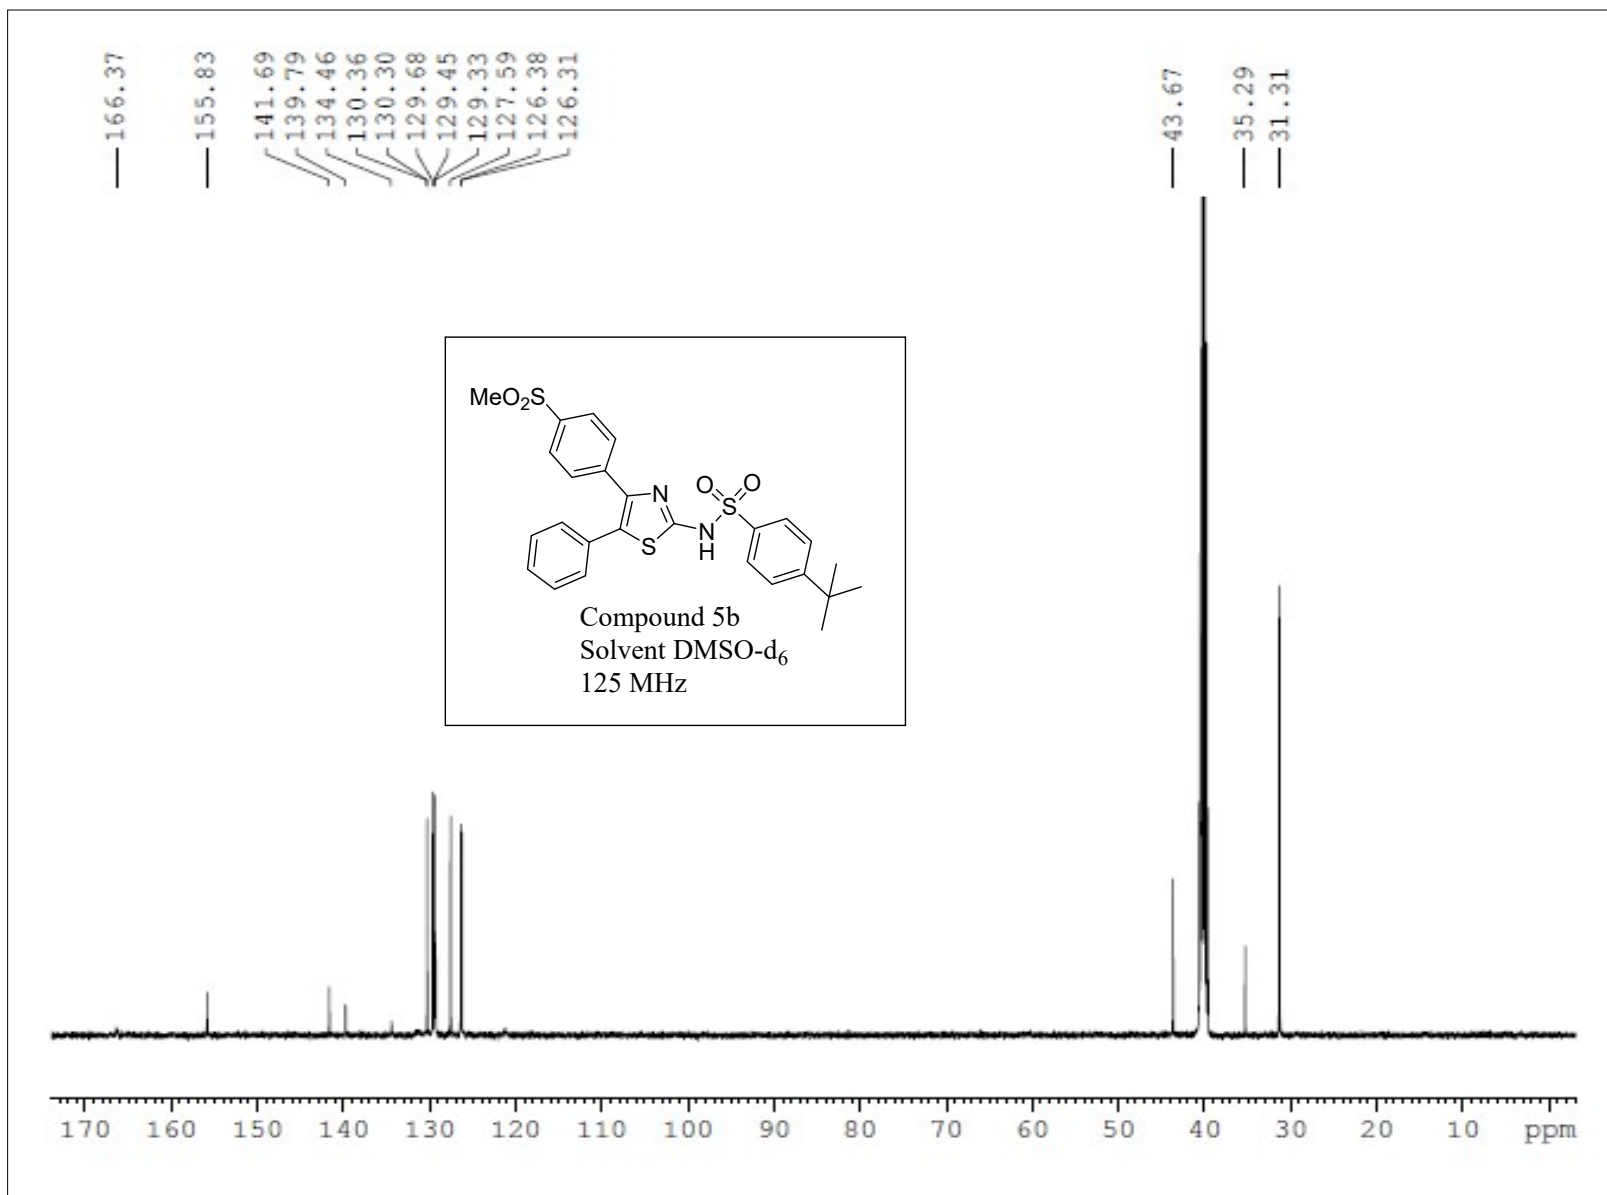

<sup>13</sup>C NMR of Compound 5b



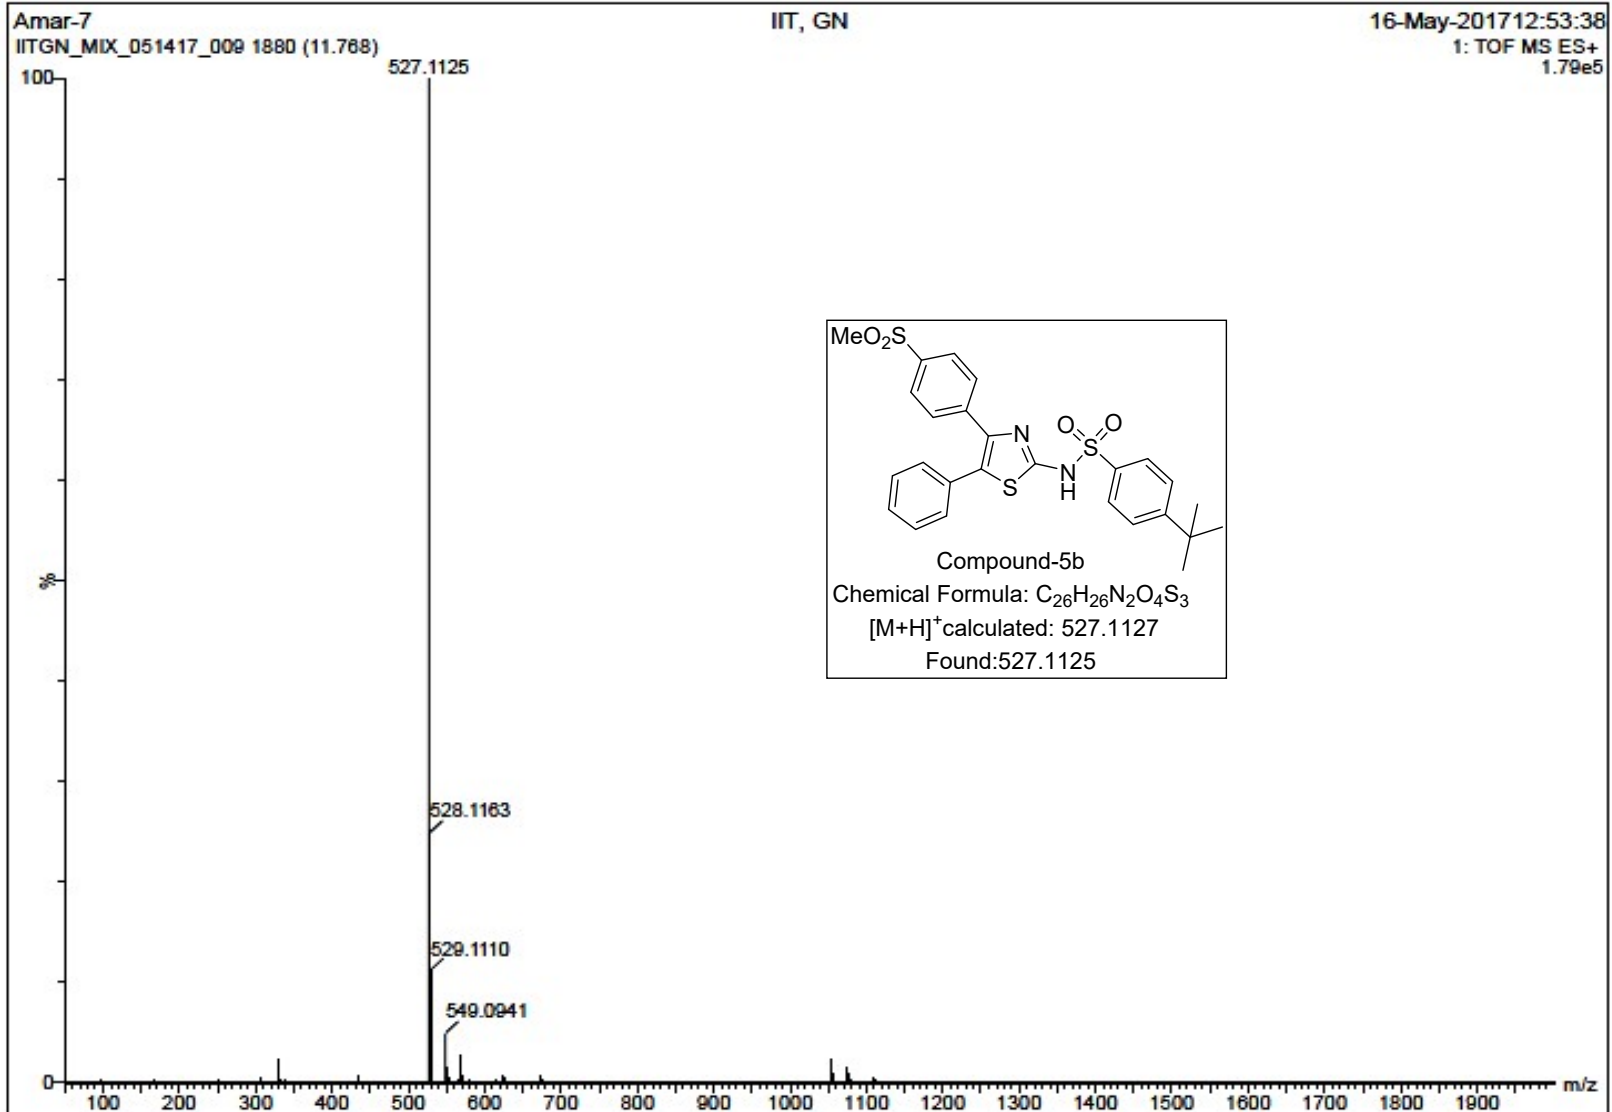

LC-ESIMS of Compound 5b

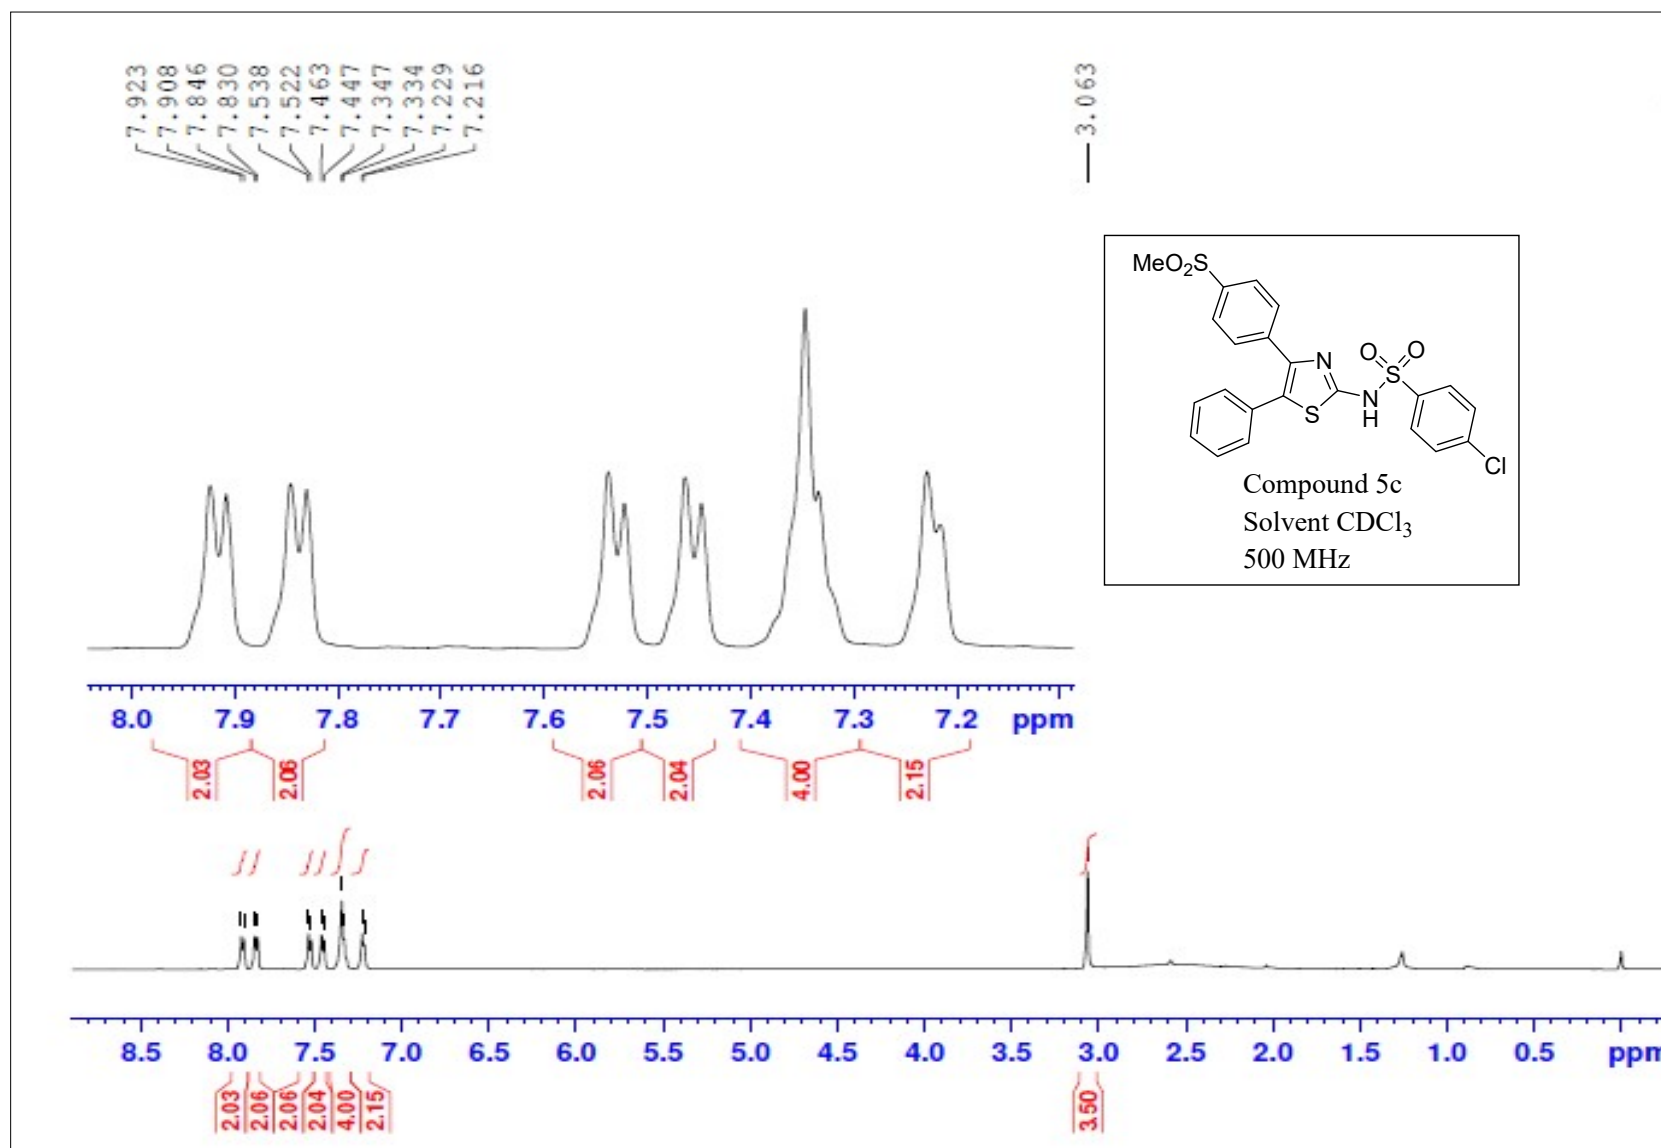

<sup>1</sup>H NMR of Compound 5c

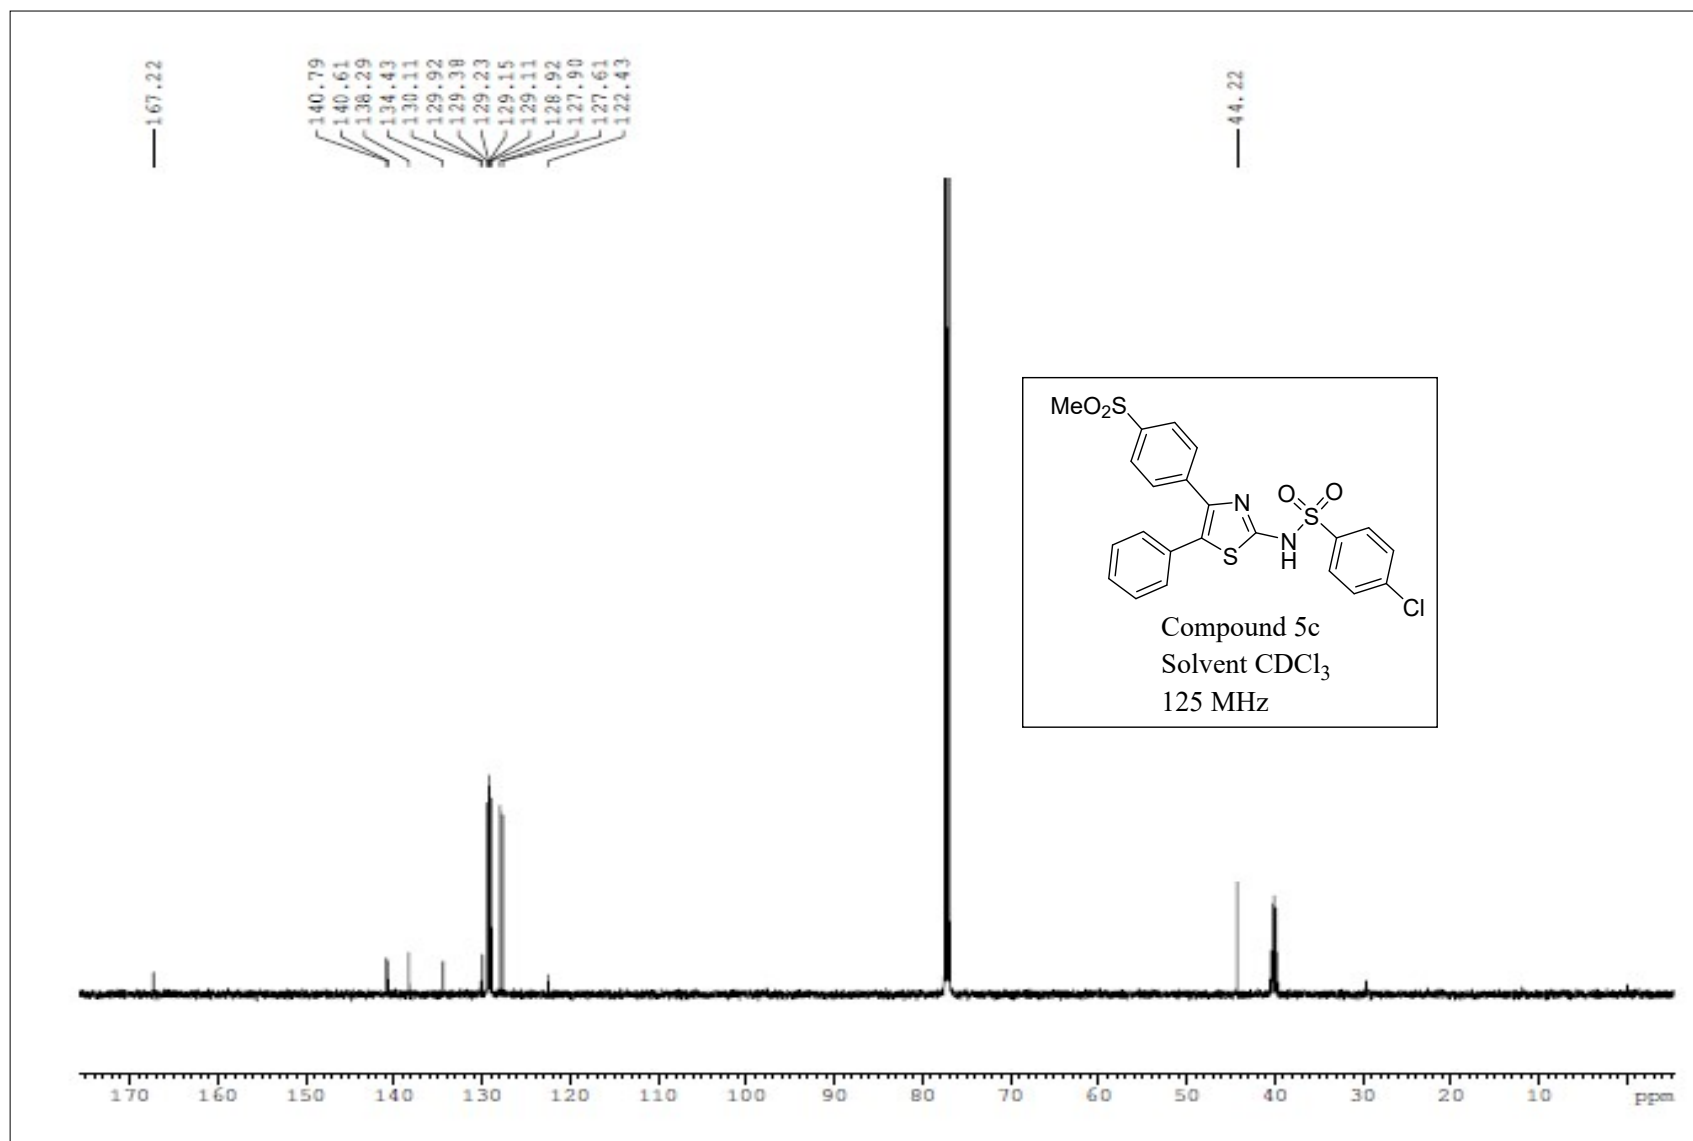

<sup>13</sup>C NMR of Compound 5c

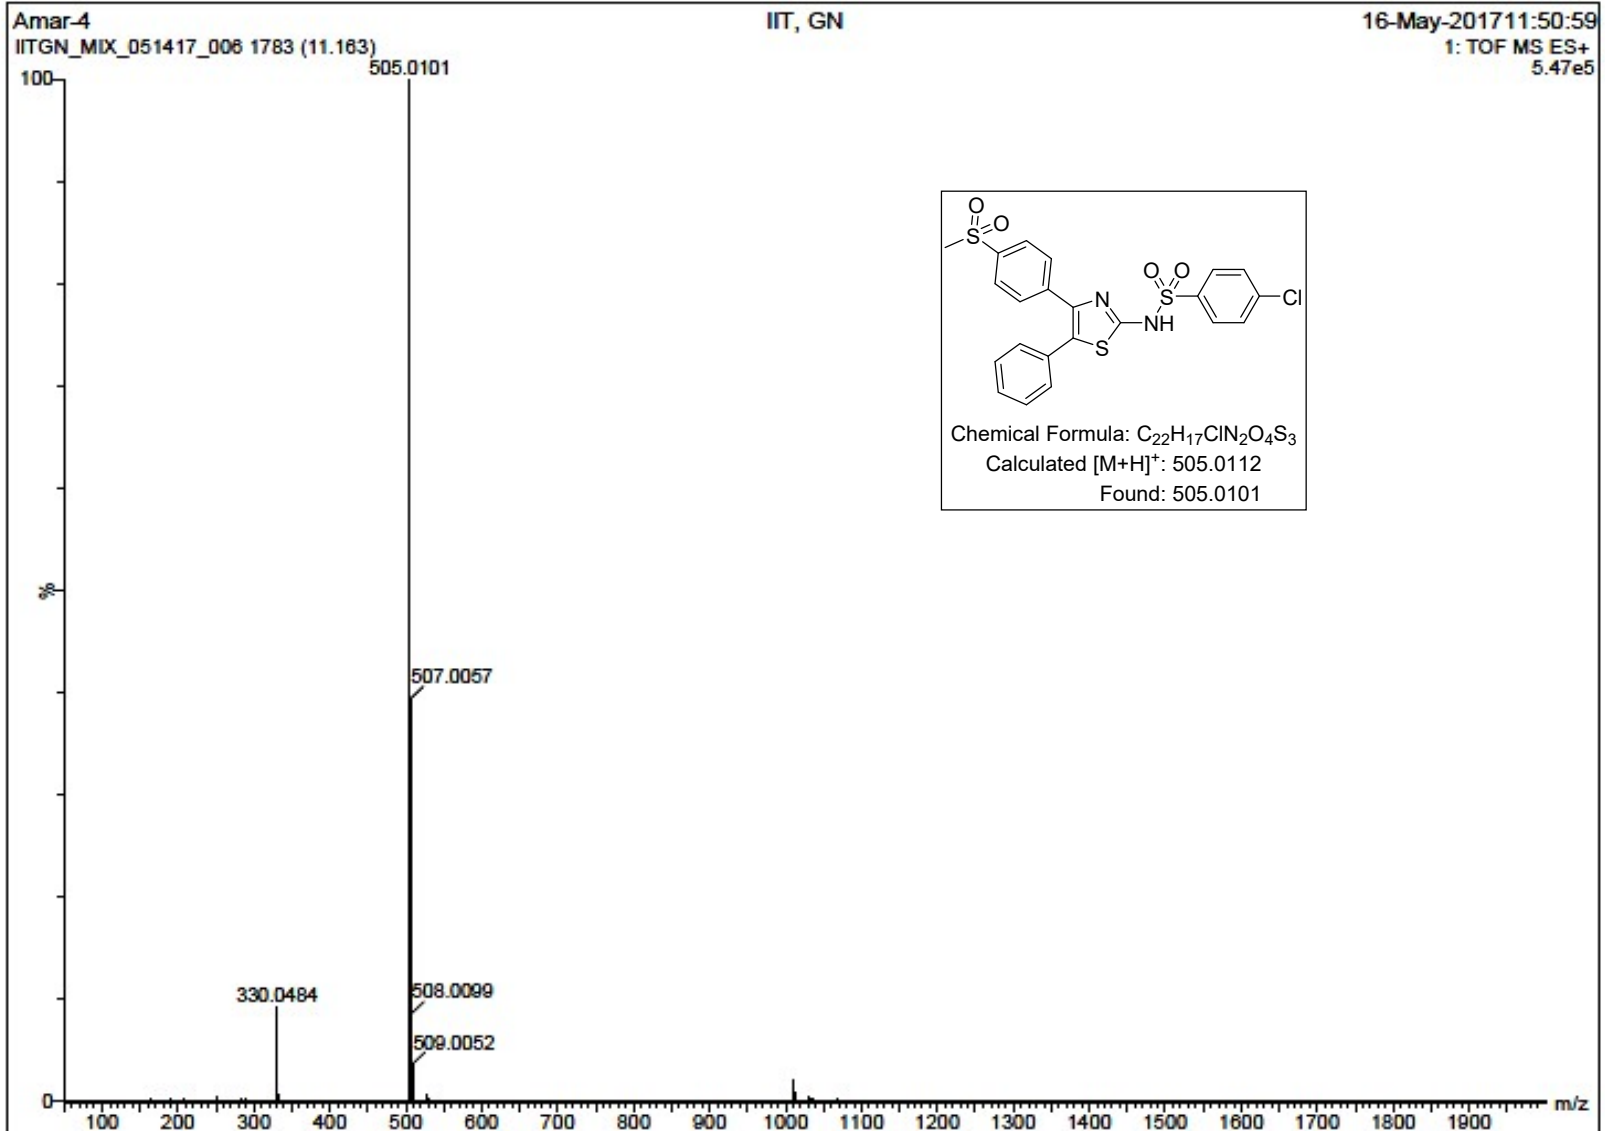

LC-ESIMS of Compound 5c

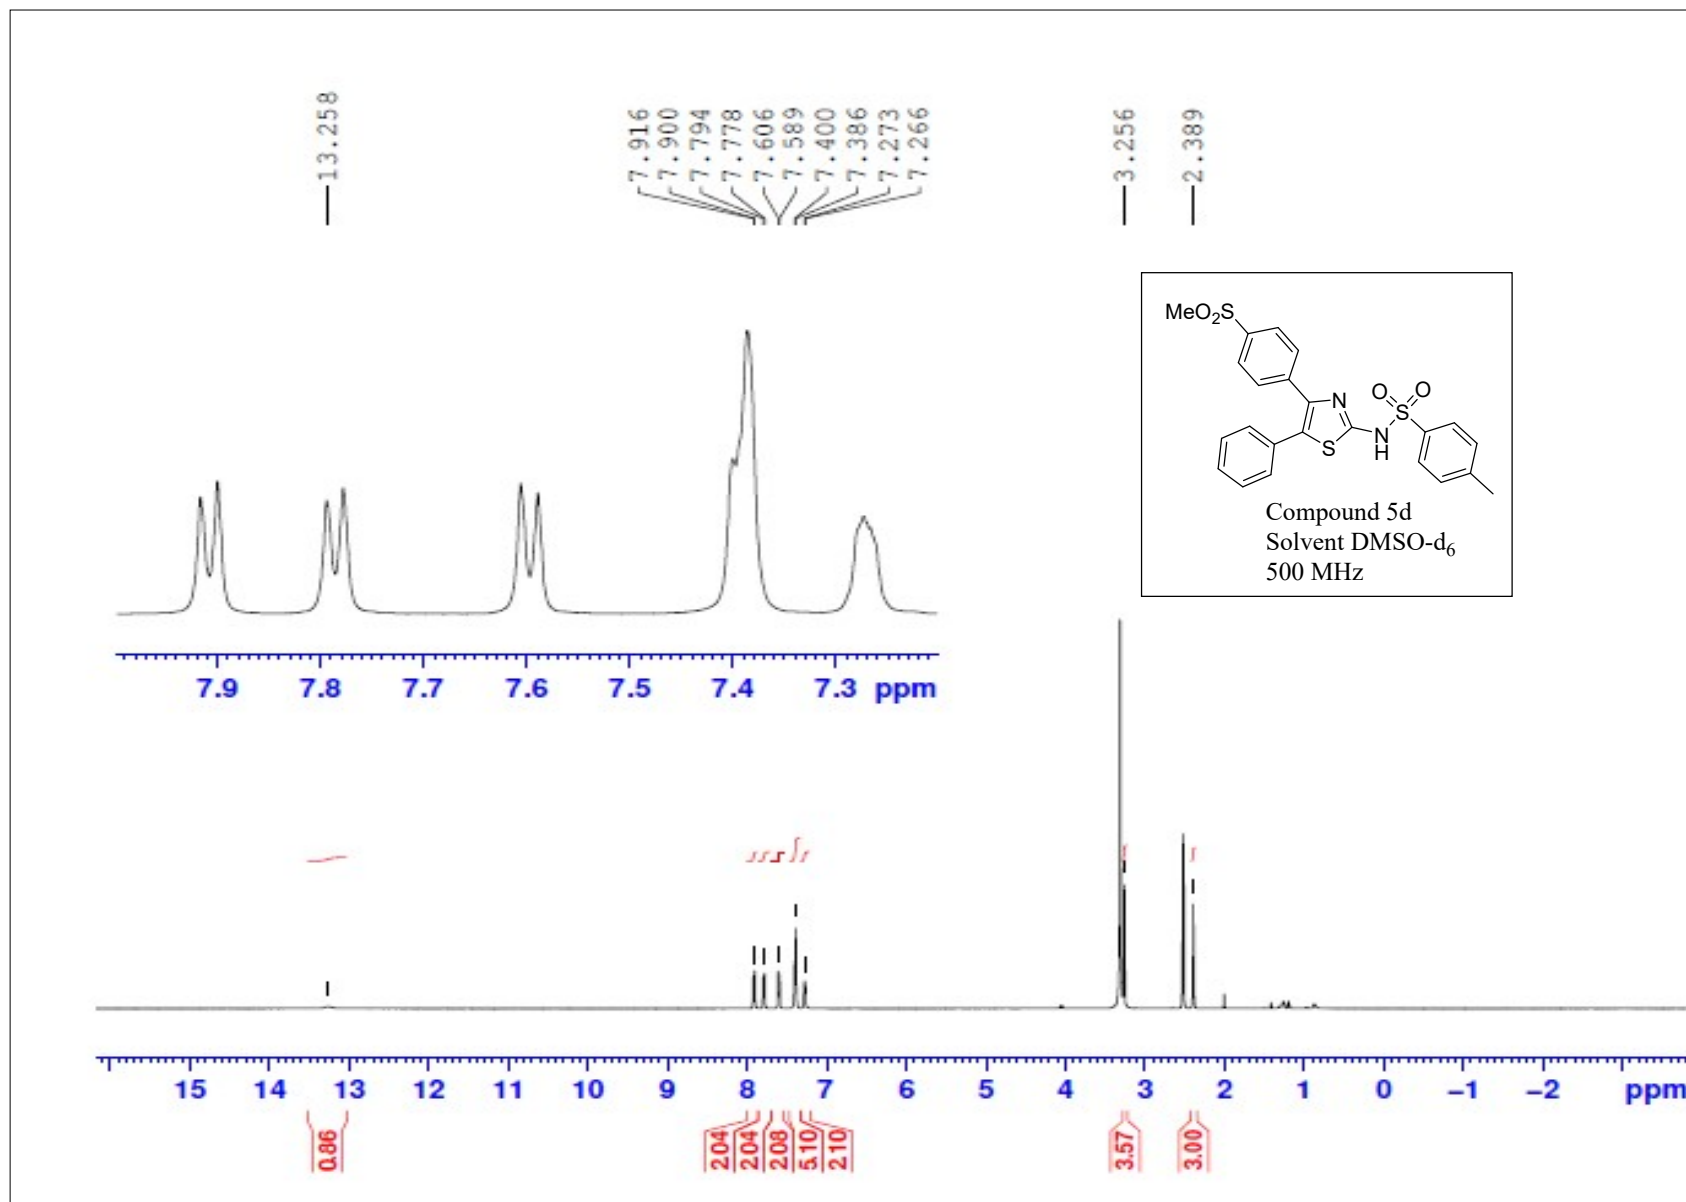

<sup>1</sup>H NMR of Compound 5d

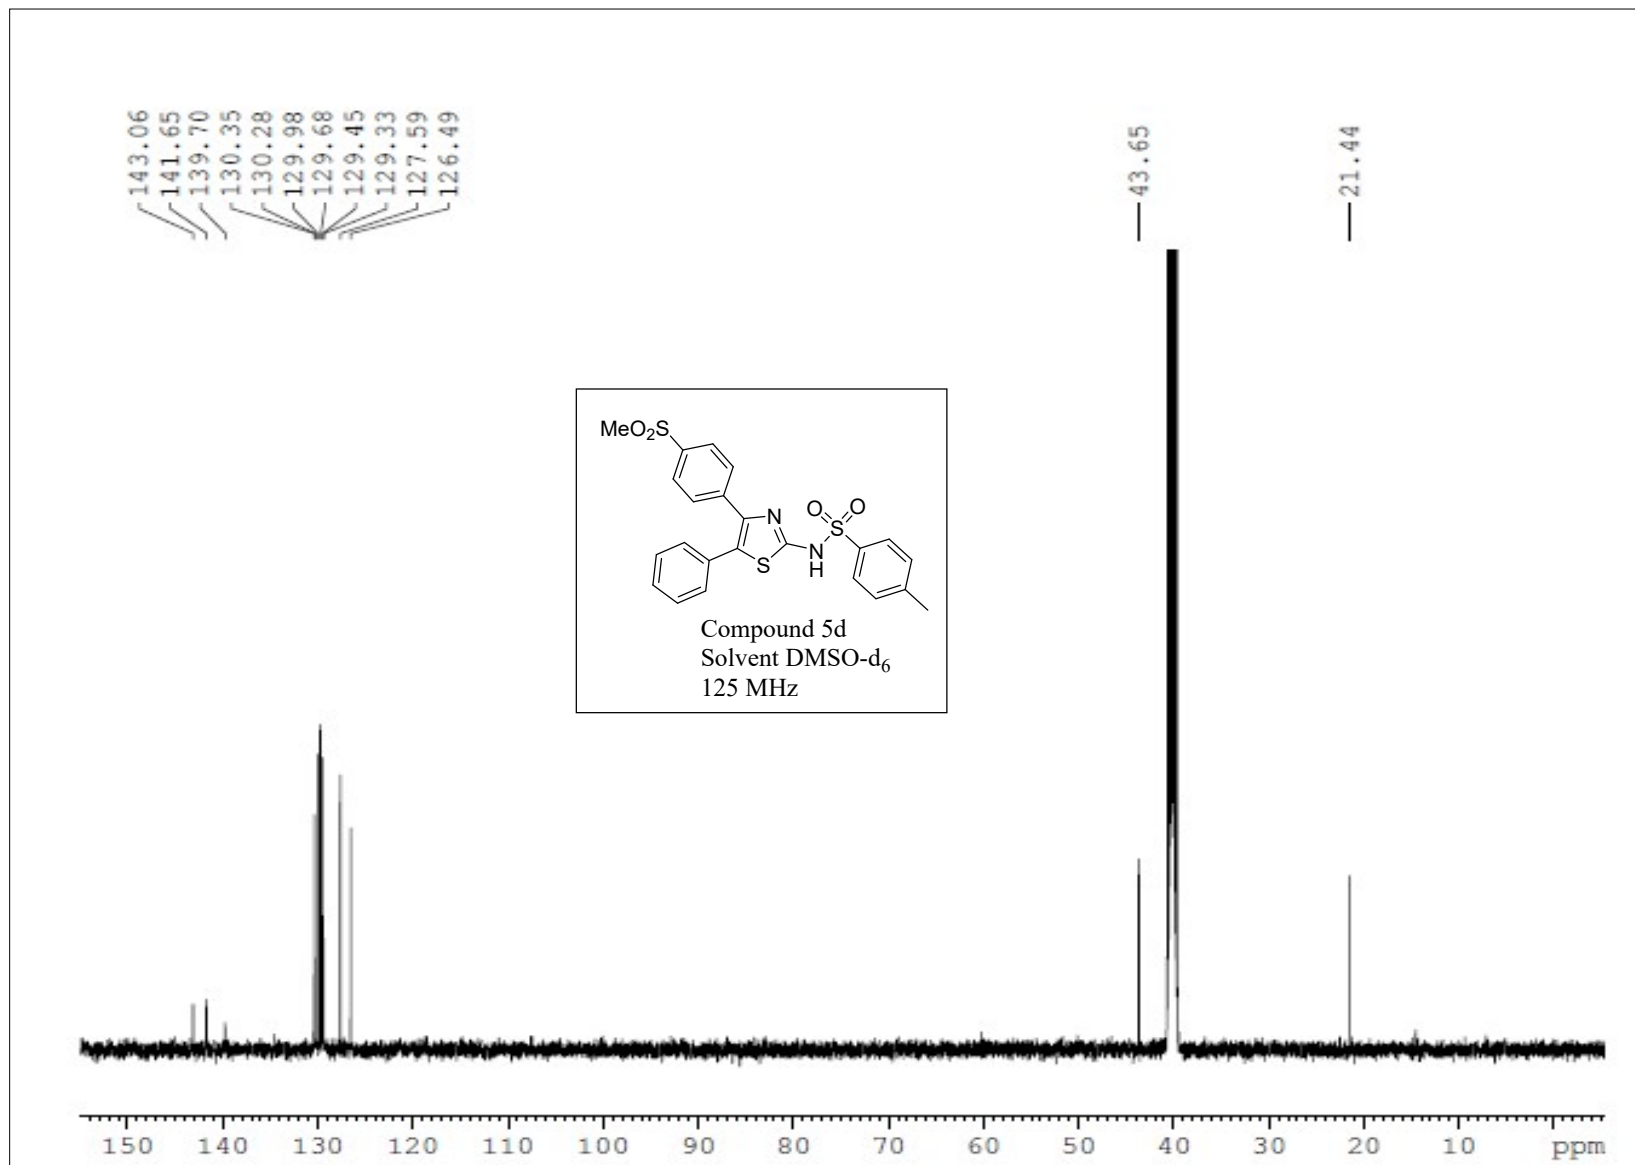

<sup>13</sup>C NMR of Compound **5d**



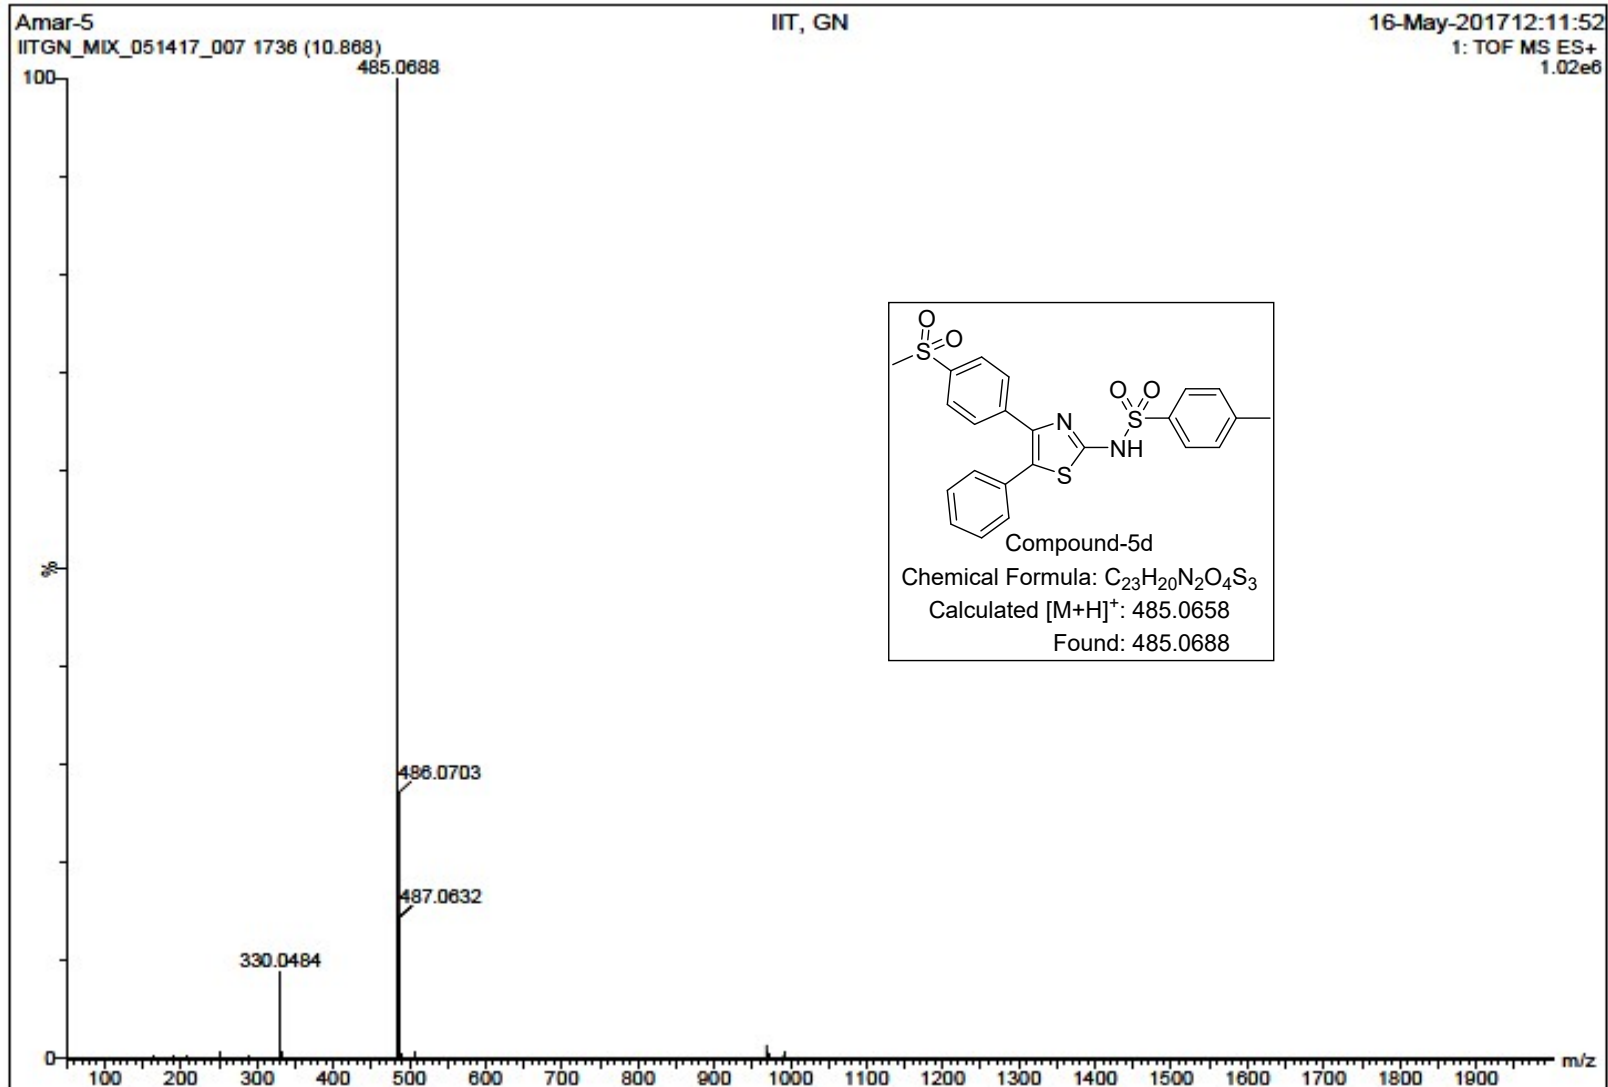

LC-ESIMS of Compound **5d**

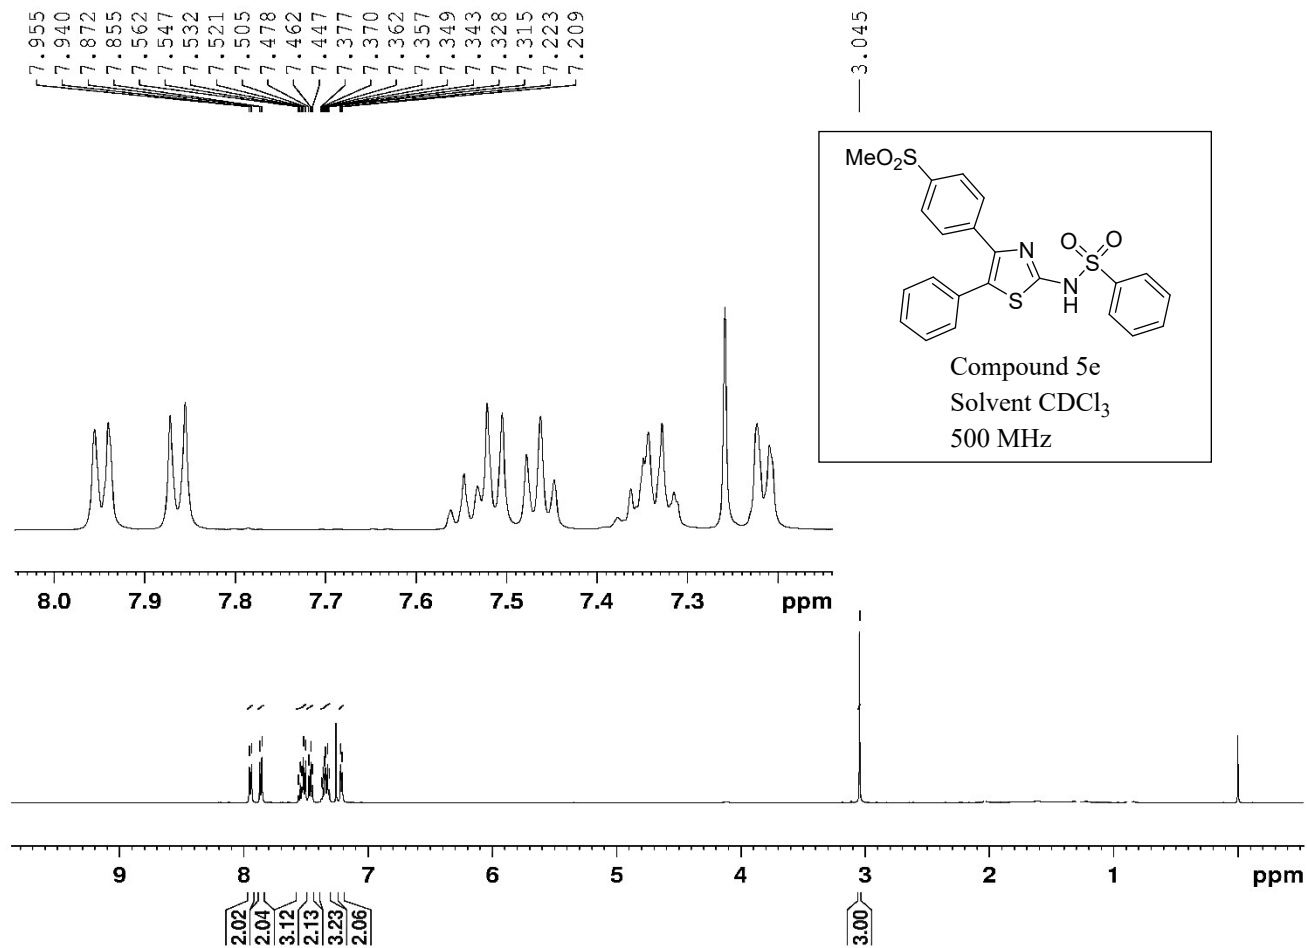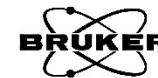

```

Current Data Parameters
NAME      hms
EXPNO    75
PROCNO   1

F2 Acquisition Parameters
Date_    20160418
Time     11:18
INSTRUM  spect
PROBHD   5 mm PAJJO DQ7
PULPROG  zgpg30
TD        65536
SOLVENT  CDCl3
NS        48
DS        2
SWH       10000.000 Hz
FIDRES    0.152588 Hz
AQ         3.2787999 sec
RG         200.00
DW         30.000 usec
DE         6.50 usec
TE         300.2 K
D1         1.0000000 sec
TDE        1

----- CHANNEL f1 -----
NUC1      1H
P1         12.15 usec
PLW1      17.0000000 W

F2 - Processing parameters
SI         65536
SF         500.090165 MHz
WDW        EM
SSB        0
LB         0.30 Hz
GB         0
PC         1.00
  
```

<sup>1</sup>H NMR of Compound 5e

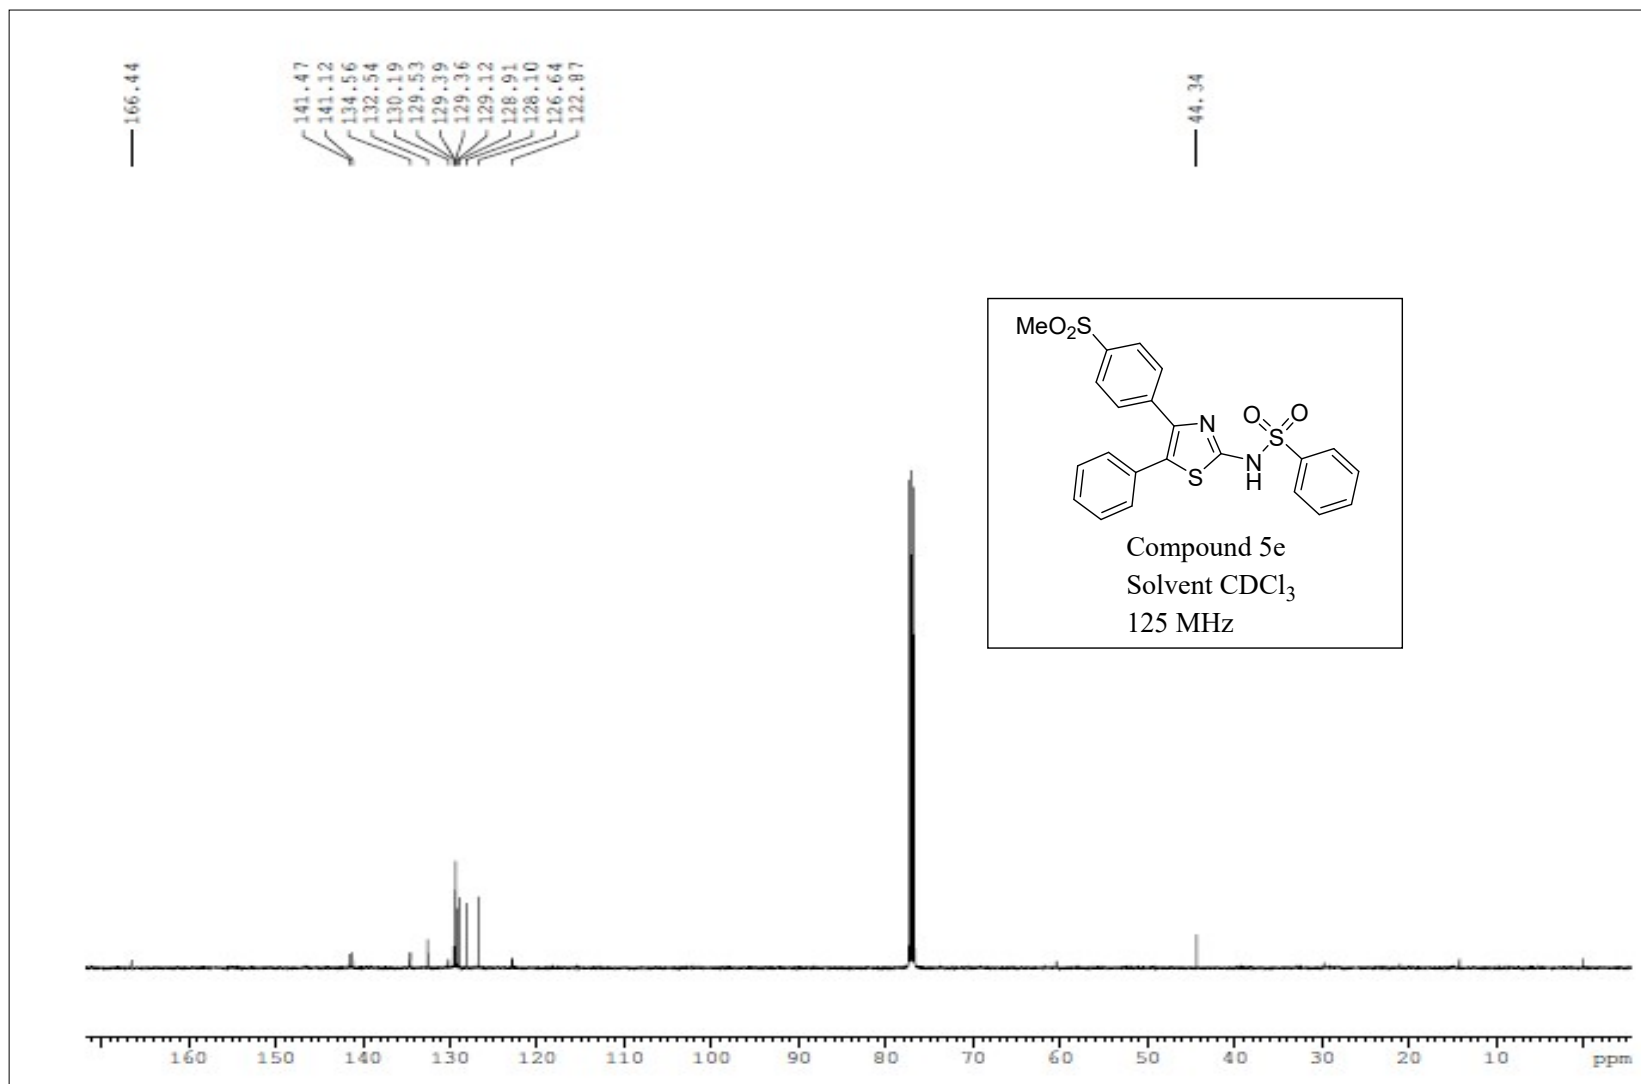

<sup>13</sup>C NMR of Compound 5e

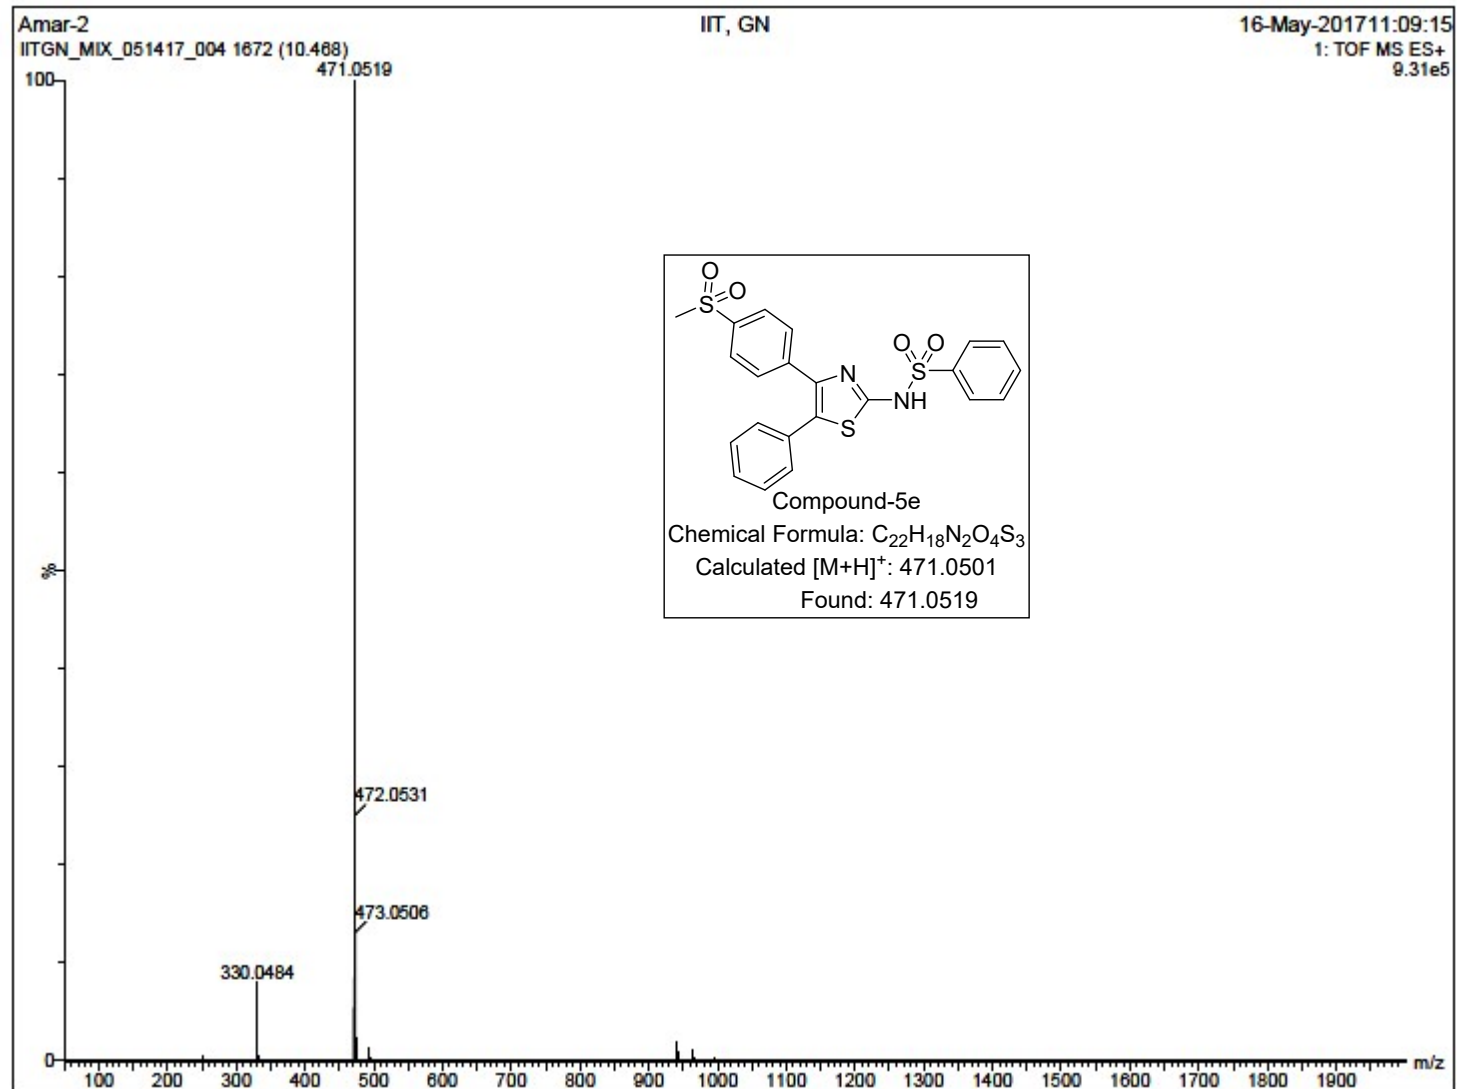

LC-ESIMS of Compound 5e

**Table S1** Experimental details (SCXRD data of **compound 4**)

|                                                                            |                                                                              |
|----------------------------------------------------------------------------|------------------------------------------------------------------------------|
| <b>CCDC NO: 2022439</b>                                                    | BD_AMAR_INTER_0m_a                                                           |
| Crystal data                                                               |                                                                              |
| Chemical formula                                                           | C <sub>16</sub> H <sub>14</sub> N <sub>2</sub> O <sub>2</sub> S <sub>2</sub> |
| $M_r$                                                                      | 330.40                                                                       |
| Crystal system, space group                                                | Monoclinic, <i>C2/c</i>                                                      |
| Temperature (K)                                                            | 293                                                                          |
| $a, b, c$ (Å)                                                              | 24.050 (2), 12.3593 (12), 11.5347 (11)                                       |
| $\beta$ (°)                                                                | 115.134 (3)                                                                  |
| $V$ (Å <sup>3</sup> )                                                      | 3103.9 (5)                                                                   |
| $Z$                                                                        | 8                                                                            |
| Radiation type                                                             | Mo $K\alpha$                                                                 |
| $\mu$ (mm <sup>-1</sup> )                                                  | 0.35                                                                         |
| Crystal size (mm)                                                          | 0.55 × 0.13 × 0.06                                                           |
| Data collection                                                            |                                                                              |
| Diffractometer                                                             | Bruker <i>APEX-II</i> CCD                                                    |
| Absorption correction                                                      | —                                                                            |
| No. of measured, independent and observed [ $I > 2\sigma(I)$ ] reflections | 10077, 3774, 3103                                                            |
| $R_{\text{int}}$                                                           | 0.032                                                                        |
| $(\sin \theta/\lambda)_{\text{max}}$ (Å <sup>-1</sup> )                    | 0.666                                                                        |

Refinement

$R[F^2 > 2\sigma(F^2)], wR(F^2), S$

0.041, 0.147, 1.07

No. of reflections

3774

No. of parameters

208

H-atom treatment

H atoms treated by a mixture of independent and constrained refinement

$\Delta\rho_{\max}, \Delta\rho_{\min}$  ( $e \text{ \AA}^{-3}$ )

0.29, -0.31

Computer programs: Bruker *APEX2*, Bruker *S SAINT*, *SHELXS97* (Sheldrick 2008), *SHELXL2014* (Sheldrick 2014), Bruker *SHELXTL*.

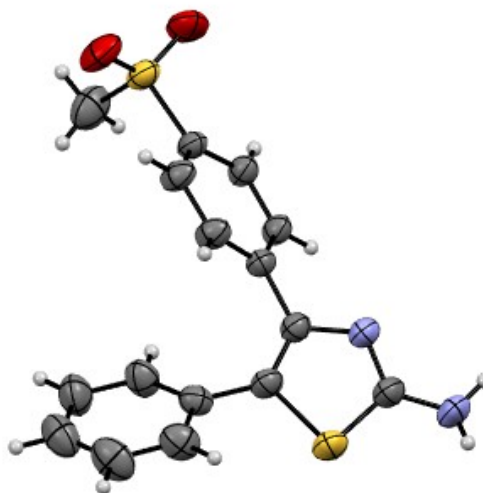

**Figure S5.** ORTEP diagram with 50% ellipsoid probability of compound 4.

**Table S2** Experimental details (SCXRD data of **compound 5c**)

**CCDC NO: 2021297**

BD\_AMAR\_CL\_TAS\_0m\_a

Crystal data

Chemical formula

C<sub>22</sub>H<sub>17</sub>ClN<sub>2</sub>O<sub>4</sub>S<sub>3</sub>

$M_r$

505.01

Crystal system, space group

Triclinic, *P*

Temperature (K)

273

$a, b, c$  (Å)

10.4187 (3), 10.7457 (3), 11.0763 (3)

$\alpha, \beta, \gamma$  (°)

109.621 (1), 93.081 (1), 102.004 (1)

$V$  (Å<sup>3</sup>)

1132.19 (6)

$Z$

2

Radiation type

Mo  $K\alpha$

$\mu$  (mm<sup>-1</sup>)

0.48

Crystal size (mm)

0.25 × 0.08 × 0.05

Data collection

Diffractometer

Bruker *APEX-II* CCD

Absorption correction

—

No. of measured, independent and  
observed [ $I > 2\sigma(I)$ ] reflections

14259, 5555, 4680

$R_{int}$

0.027

$(\sin \theta/\lambda)_{max}$  (Å<sup>-1</sup>)

0.666

Refinement

$R[F^2 > 2\sigma(F^2)]$ ,  $wR(F^2)$ ,  $S$

0.038, 0.147, 1.11

|                                                                 |                               |
|-----------------------------------------------------------------|-------------------------------|
| No. of reflections                                              | 5555                          |
| No. of parameters                                               | 290                           |
| H-atom treatment                                                | H-atom parameters constrained |
| $\Delta\rho_{\max}, \Delta\rho_{\min}$ ( $e \text{ \AA}^{-3}$ ) | 0.47, -0.50                   |

Computer programs: Bruker *APEX2*, Bruker *SAINT*, *SHELXS97* (Sheldrick 2008), *SHELXL2014* (Sheldrick 2014), Bruker *SHELXTL*

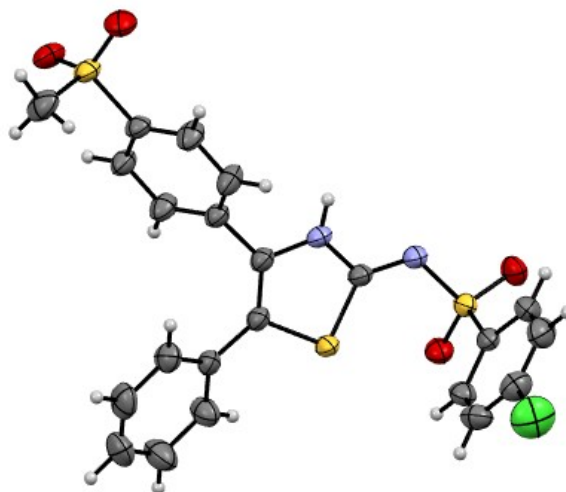

**Figure S6.** ORTEP diagram with 50% ellipsoid probability of compound 5c.

### Crystallization conditions

The compounds were dissolved in minimum amount of acetone followed by addition of suitable amount of hexane. The resulting solution was subjected to slow solvent evaporation at room temperature to obtain good quality crystals.
